# Supplementary material for: Cluster effect through the oligomerisation of bioactive disaccharide AMOR on pollen tube capacitation in Torenia fournieri
Source: Royal Society of Chemistry journal article supplement (doi:10.1039/d4cb00032c), 2024-01-01
Supplement: d4cb00032c1.pdf [file d4cb00032c1.pdf]

**Supporting Information**

**Cluster Effect through Oligomerization of Bioactive disaccharide**

**AMOR for pollen tube capacitation in *Torenia***

Akane G Mizukami\*<sup>a</sup>, Shuhei Kusano<sup>b</sup>, Kumi Matsuura-Tokita<sup>a</sup> Shinya Hagihara<sup>b</sup>,  
Tetsuya Higashiyama\*<sup>a,c</sup>

<sup>a</sup> Department of Biological Sciences, Graduate School of Science, The University of Tokyo, Tokyo 113-0033, Japan. E-mail: [amizukami@g.ecc.u-tokyo.ac.jp](mailto:amizukami@g.ecc.u-tokyo.ac.jp), [higashi@bs.s.u-tokyo.ac.jp](mailto:higashi@bs.s.u-tokyo.ac.jp)

<sup>b</sup> RIKEN Center for Sustainable Resource Science, Saitama 351-0198, Japan.

<sup>c</sup> Institute of Transformative Bio-Molecules (WPI-ITbM), Nagoya University, Nagoya 464-8601, Japan.

<sup>d</sup> Present address; Division of Liberal Arts and Sciences, Aichigakuin university, Aichi 470-0195, Japan.

**Table of contents**

|                                              |       |
|----------------------------------------------|-------|
| 1. General                                   | S1    |
| 2. Synthesis scheme for AMOR oligomers       | S2-3  |
| 3. Synthesis procedures for AMOR oligomers   | S4-26 |
| 4. Material and methods for AMOR bioactivity | S27   |
| 5. Reference                                 | S28   |

## 1. General

Commercially available reagents were obtained from Tokyo Kasei, Wako Pure Chemical Industries Ltd., KANTO CHEMICAL CO., INC., Sigma-Aldrich Merck, and Nacalai tesque, and used without further purification.

The  $^1\text{H}$  and  $^{13}\text{C}\{^1\text{H}\}$  NMR were recorded on a Bruker AVANCE 600 (600 MHz for  $^1\text{H}$ , 150 MHz for  $^{13}\text{C}$ ) spectrometer and a JEOL JNM-ECA500 (500 MHz for  $^1\text{H}$ , 125 MHz for  $^{13}\text{C}$ ) spectrometer. Chemical shifts were reported in ppm ( $\delta$ ), and coupling constants were reported in Hz.  $^1\text{H}$  and  $^{13}\text{C}$ -resonances were referenced to solvent residual peaks for  $\text{CDCl}_3$  ( $^1\text{H}$ , 7.26 ppm),  $\text{D}_2\text{O}$  (1H, 4.70 Hz), and  $\text{CDCl}_3$  ( $^{13}\text{C}$ , 77.16 ppm). Multiplicity and qualifier abbreviations are as follows: s = singlet, d = doublet, t = triplet, q = quartet, m = multiplet, doublet of doublets (dd), doublet of triplets (dt), doublet of doublet of doublets (ddd), doublet of doublet of doublet of doublets (dddd). Spectra were processed by Bruker Top-spin (Bruker) and Delta NMR software (JEOL).

High resolution mass analyses (HRMS) were submitted to the Mass Spectrometry Laboratory at RIKEN (Wako, Japan). For crude analysis, ultra-high-performance liquid chromatography-mass spectrometry (UPLC/MS) was performed on a SHIMADZU LCMS-2020 (Shimadzu, Kyoto, Japan) equipped with a reverse phase C18 column (2.7  $\mu\text{m}$  particle size, 2.1 x 100 mm), an API/ESI mass spectrometry detector, and an ultraviolet detector (Shimadzu, Kyoto, Japan). Matrix-assisted laser desorption/ionisation time-of-flight mass spectrometry (MALDI-TOF-MS) was performed on a Bruker Daltonics ultrafleXtreme using  $\alpha$ -cyano-4-hydroxycinnamic acid as the matrix.

Thin-layer chromatography was performed on Merck 60 F<sub>254</sub> precoated silica gel plates. Reverse phase preparative Thin-layer chromatography was performed on Merck RP-8 modified silica gel plate coated with F<sub>254</sub> indicator. Column chromatography was performed on open column using silica gel (Silica Gel 60 N; 63~210 mesh or 40~50 mesh; Kanto Chemical Co., Inc.).

## 2. Synthesis schemes for AMOR oligomers

### Scheme 1. Synthesis of azide-tethered AMOR with protecting groups.

#### Synthesis of glycosyl acceptor

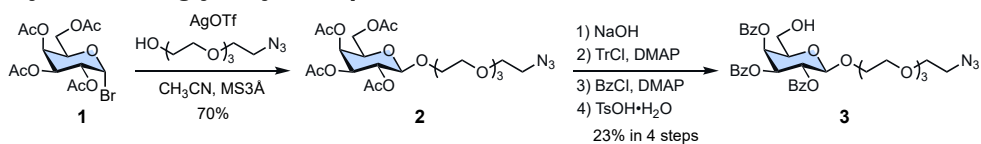

#### Synthesis of glycosyl donor

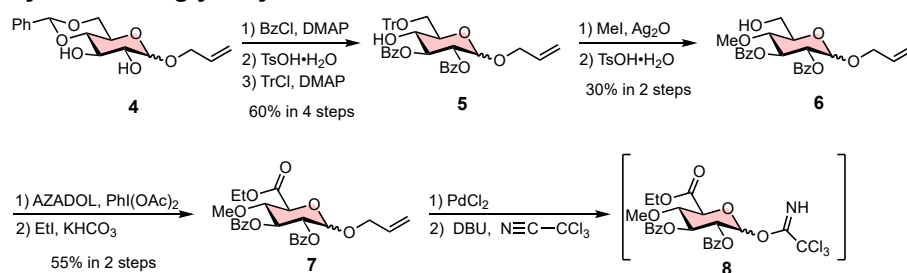

#### Glycosylation

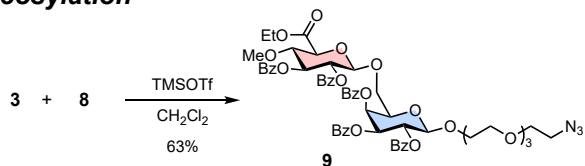

## Scheme 2. Synthesis of AMOR oligomers

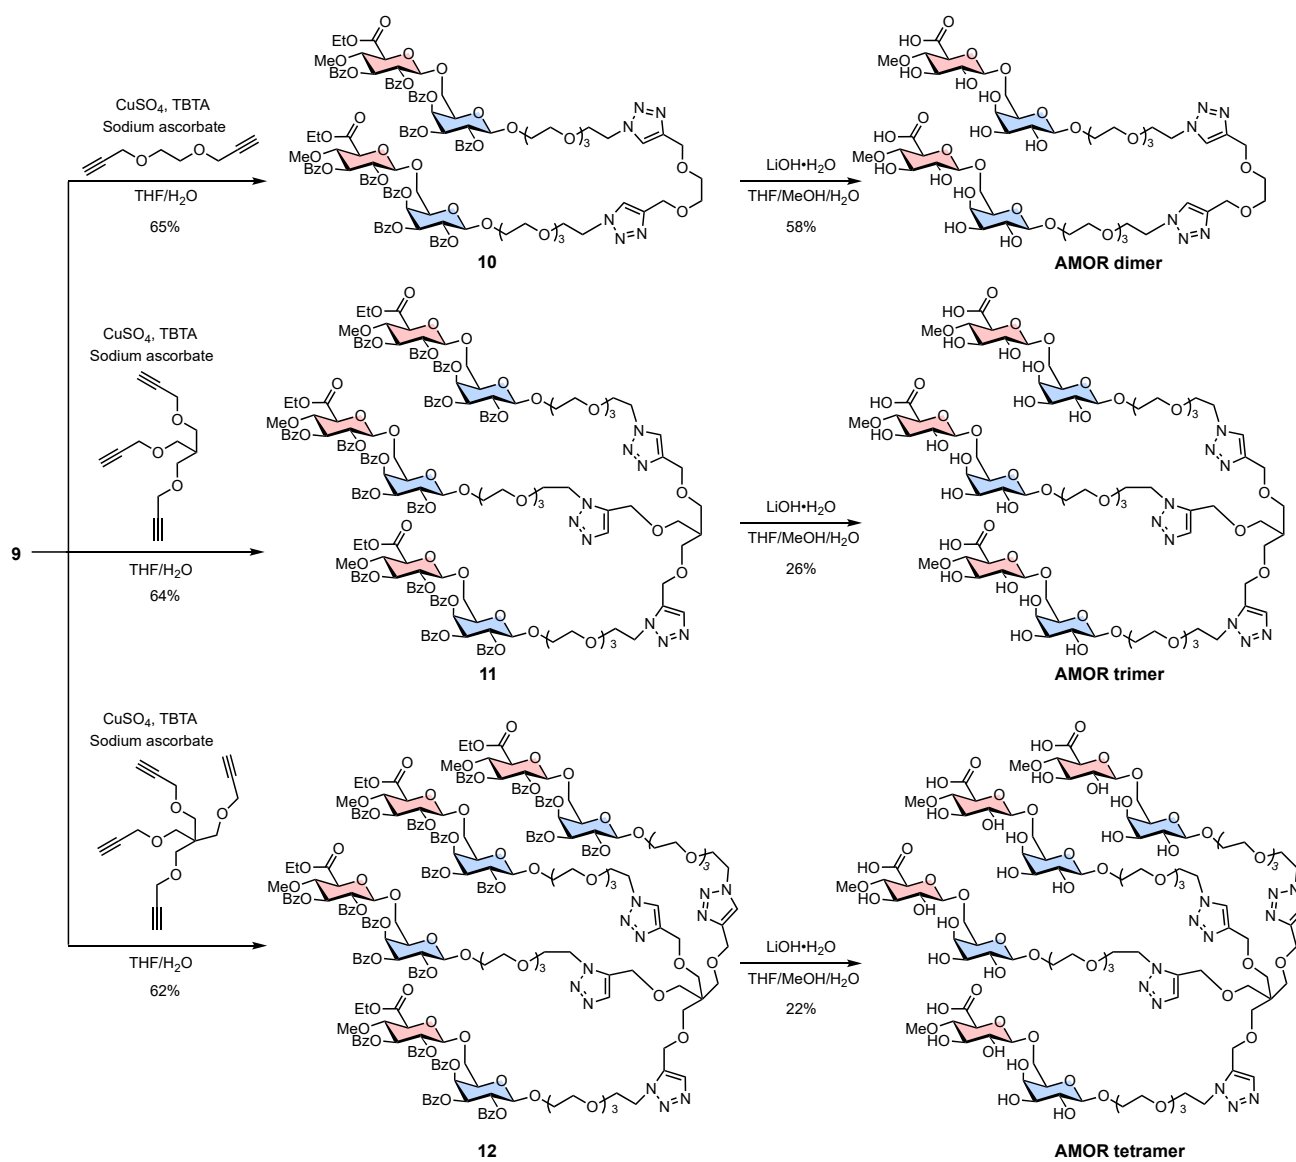

### 3. Synthesis procedures for AMOR oligomers

Compounds **4**, tetraethylene glycol mono-azide, and each alkyne linker were prepared as reported previously.<sup>1-3</sup>

#### Synthesis of **2**

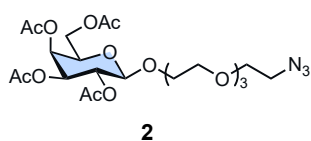

AgOTf (4.18 g, 16.3 mmol) was added to a mixture of **1** (6.1 g, 14.8 mmol) and tetraethylene glycol monoazide (3.48 g, 19.8 mmol) in CH<sub>3</sub>CN (74 mL) and MS3Å at -20°C. This reaction mixture was stirred at -20°C for 90 min and then allowed to slowly warm to room temperature. The reaction mixture was stirred for 18 h at

room temperature, after which the mixture was filtered through a Celite® pad and concentrated. The residue underwent column chromatography (silica gel, hexane:AcOEt = 1:0 to 50:1 to 25:1) to afford **2** as a colourless oil (6.0 g, 70%); <sup>1</sup>H NMR (500 MHz, CDCl<sub>3</sub>) δ 5.38 (d, *J* = 3.5 Hz, 1H), 5.21 (dd, *J* = 8.0, 10.5 Hz, 1H), 5.01 (dd, *J* = 3.5, 10.5, 1H), 4.56 (d, *J* = 8.0 Hz, 1H), 4.17 (dd, *J* = 6.0, 10.5 Hz, 1H), 4.12 (d, *J* = 7.0, 10.5 Hz, 1H), 3.95 (dt, *J* = 4.0, 11.0 Hz, 1H), 3.91 (dd, *J* = 6.0, 7.0 Hz, 1H), 3.77–3.72 (m, 1H), 3.69–3.62 (m, 12H), 3.39 (t, *J* = 5.0 Hz, 2H), 2.15 (s, 3H), 2.06 (s, 3H), 2.05 (s, 3H), 1.98 (s, 3H); <sup>13</sup>C NMR (125 MHz, CDCl<sub>3</sub>) δ 170.5, 170.4, 170.3, 169.6, 101.5, 71.0, 70.8, 70.8, 70.4, 70.2, 69.2, 68.9, 67.2, 61.4, 50.8, 20.9, 20.8, 20.7; HRMS (ESI): calculated for [M + Na]<sup>+</sup> requires *m/z* = 572.2068, found 572.2051.

#### Synthesis of **3**

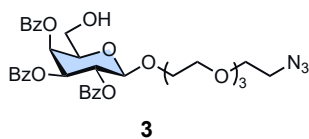

##### Step 1: Acetyl group removal

To a solution of **2** (6.00 g, 10.9 mmol) in MeOH was added NaOH (1.96 g, 49.1 mmol) at room temperature. The mixture was stirred for 90 min at room temperature, after which the pH of the reaction mixture was neutralised with AcOH. The resulting mixture was concentrated in vacuo and the residue underwent short column chromatography (silica gel, CHCl<sub>3</sub>:MeOH = 10:1 to 5:1). The roughly purified product (3.0 g) was used in the next step without further purification.

##### Step 2: Trityl protection of the 6-OH group

TrCl (6.58 g, 23.6 mmol) was added to a mixture of the above product (3.0 g, ~7.87 mmol) and 4-dimethylaminopyridine (DMAP; 96.1 mg, 0.787 mmol) in pyridine (26 mL) at room temperature. The reaction mixture was stirred for 16 h at room temperature, after which the reaction was quenched with an excess amount of MeOH and concentrated in vacuo. The residue underwent short column chromatography (silica gel, CHCl<sub>3</sub>:MeOH = 10:1 to 5:1). The roughly purified product was used in the next step without further purification.

##### Step 3: Benzoyl protection

BzCl (3.2 mL, 27.5 mmol) was slowly added to a mixture of the above product and DMAP (96.1 mg, 0.787

mmol) in pyridine (31 mL) at 0°C. This reaction mixture was stirred at 0°C for 15 min and then warmed to room temperature. After stirring for 18 h at room temperature, the reaction mixture was diluted with EtOAc and washed with H<sub>2</sub>O and brine. The organic layer was dried over Na<sub>2</sub>SO<sub>4</sub>, filtered, and concentrated in vacuo. The residue was used in the next step without purification.

#### Step 4: Removal of trityl group

To a solution of the above product in CH<sub>2</sub>Cl<sub>2</sub> (39 mL) and MeOH (39 mL) was added TsOH•H<sub>2</sub>O (271 mg, 1.57 mmol) at room temperature. After stirring for 3 h at room temperature, TsOH•H<sub>2</sub>O (700 mg, 4.07 mmol) was added to complete the reaction. The mixture was further stirred for 12 h, after which the reaction mixture was diluted with CH<sub>2</sub>Cl<sub>2</sub> and washed with saturated NaHCO<sub>3</sub> and brine. The organic layer was dried over Na<sub>2</sub>SO<sub>4</sub>, filtered, and concentrated in vacuo. The residue underwent column chromatography (silica gel, CHCl<sub>3</sub>:AcOEt = 2:1 to 1:1) to yield 3 as a white foam (1.74 g, 23% in four steps) <sup>1</sup>H NMR (600 MHz, CDCl<sub>3</sub>) δ 8.11 (d, *J* = 7.5 Hz, 2H), 7.99 (d, *J* = 7.5 Hz, 2H), 7.81 (d, *J* = 7.5 Hz, 2H), 7.62 (t, *J* = 7.5 Hz, 1H), 7.52 (t, *J* = 7.5 Hz, 1H), 7.49 (dd, *J* = 7.5, 7.5 Hz, 2H), 7.43 (t, *J* = 7.5 Hz, 1H), 7.39 (dd, *J* = 7.5, 7.5 Hz, 2H), 7.25 (dd, *J* = 7.5, 7.5 Hz, 2H), 5.83 (dd, *J* = 7.9, 10.2 Hz, 1H), 5.81 (d, *J* = 3.4 Hz, 1H), 5.58 (dd, *J* = 3.4, 10.2 Hz, 1H), 4.93 (d, *J* = 7.9 Hz, 1H), 4.05–4.00 (m, 2H), 3.88–3.83 (m, 2H), 3.67–3.56 (m, 9 H), 3.52–3.45 (m, 4 H), 3.37 (t, *J* = 4.8 Hz, 2H), 2.77 (t, *J* = 6.8 Hz, 1H); <sup>13</sup>C NMR (150 MHz, CDCl<sub>3</sub>) δ 166.9, 165.7, 165.5, 134.0, 133.5, 133.4, 130.3, 129.9, 129.6, 128.9, 128.8, 128.8, 128.6, 128.5, 101.9, 74.2, 72.0, 70.8, 70.8, 70.7, 70.2, 69.6, 69.2, 60.8, 50.8; HRMS (ESI): calculated for [M+Na]<sup>+</sup> requires *m/z* = 716.2431, found 716.2424.

### Synthesis of 5

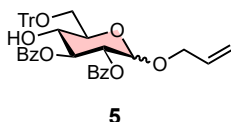

#### Step 1: Benzoyl protection

BzCl (4.7 mL, 16.3 mmol) was slowly added to a mixture of 4 (5.45 g, 17.7 mmol) and DMAP (216 mg, 1.77 mmol) in pyridine (89 mL) at 0°C. This reaction mixture was stirred at 0°C for 15 min and then warmed to room temperature. The reaction mixture was stirred for 18 h at room temperature, after which the mixture was diluted with EtOAc and washed with H<sub>2</sub>O and brine. The organic layer was dried over Na<sub>2</sub>SO<sub>4</sub>, filtered through a silica gel pad, and concentrated in vacuo. The resulting product (6.52 g) was used in the next step without further purification.

#### Step 2: Removal of benzylidene group

To a solution of the above product (6.52 g, ~12.6 mmol) in CH<sub>2</sub>Cl<sub>2</sub> (67 mL) and MeOH (17 mL) was added TsOH•H<sub>2</sub>O (217 mg, 1.26 mmol) at room temperature. After stirring for 3.5 h at room temperature, TsOH•H<sub>2</sub>O (109 mg, 0.63 mmol) was added to complete the reaction. The mixture was further stirred for 1 h, after which the reaction mixture was diluted with CH<sub>2</sub>Cl<sub>2</sub> and washed with saturated NaHCO<sub>3</sub> and brine. The organic layer

was dried over Na<sub>2</sub>SO<sub>4</sub>, filtered, and concentrated in vacuo. The residue was used in the next step without purification

### Step 3: Trityl protection of 6-OH group

TrCl (5.27 g, 18.9 mmol) was added to a mixture of the above product and DMAP (154 mg, 1.26 mmol) in pyridine (42 mL) at room temperature. After stirring for 12 h at room temperature, TrCl (4.5 g, 16.1 mmol) was added to complete the reaction. The mixture was further stirred for 12 h, after which the reaction was quenched with an excess amount of MeOH and concentrated in vacuo. The residue underwent column chromatography (silica gel, hexane:EtOAc = 6:1 to 3:1) to yield 5 as a white foam (7.08 g, 60% in three steps); <sup>1</sup>H NMR (600 MHz, CDCl<sub>3</sub>) δ 8.00–7.98 (m, 4H), 7.51–7.48 (m, 8H), 7.38–7.35 (m, 4H), 7.32 (dd, *J* = 7.4, 7.4 Hz, 6H), 7.25 (t, *J* = 7.4 Hz, 3H), 5.90–5.84 (m, 1H), 5.78 (dd, *J* = 9.0, 9.0 Hz, 1H), 5.31 (dddd, *J* = 1.3, 1.4, 1.5, 15.7 Hz, 1H), 5.27–5.25 (m, 2H), 5.16 (dddd, *J* = 1.3, 1.4, 1.5, 10.3 Hz, 1H), 4.25 (dddd, *J* = 1.5, 1.5, 5.1, 13.1 Hz, 1H), 4.05 (dddd, *J* = 1.3, 1.3, 6.0, 13.1 Hz, 1H), 3.96 (ddd, *J* = 4.0, 4.8, 9.1 Hz, 1H), 3.91 (ddd, *J* = 3.9, 9.1, 9.1 Hz, 1H), 3.49 (dd, *J* = 4.0, 10.1 Hz, 1H), 3.45 (dd, *J* = 4.8, 10.1 Hz, 1H), 2.83 (d, *J* = 3.9 Hz, 1H); <sup>13</sup>C NMR (150 MHz, CDCl<sub>3</sub>) δ 167.2, 166.1, 143.8, 133.7, 133.4, 133.4, 130.0, 130.0, 129.6, 129.4, 128.8, 128.5, 128.5, 128.1, 127.3, 117.7, 95.2, 87.3, 74.0, 71.6, 71.4, 70.5, 68.6, 64.0; HRMS (ESI): calculated for [M+Na]<sup>+</sup> requires *m/z* = 693.2464, found 693.2462.

## Synthesis of 6

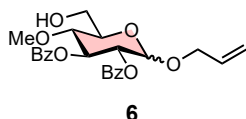

### Step 1: Methylation

MeI (6.4 mL, 103 mmol) was added to a mixture of 5 (6.88 g, 10.3 mmol) and Ag<sub>2</sub>O (23.9 g, 103 mmol) in dimethylformamide (DMF; 52 mL) at room temperature. After stirring for 21 h at room temperature, MeI (6.4 mL, 103 mmol) and Ag<sub>2</sub>O (23.9 g, 103 mmol) were added to complete the reaction. The mixture was stirred for 18 h and then filtered through a Celite® pad. The filtrate was diluted with EtOAc and washed with H<sub>2</sub>O four times. The organic layer was dried over Na<sub>2</sub>SO<sub>4</sub>, filtered through a silica gel pad, and concentrated in vacuo. The residue was used in the next step without further purification.

### Step 2: Benzylidene group removal

To a solution of the above product in CH<sub>2</sub>Cl<sub>2</sub> (50 mL) and MeOH (50 mL) was added TsOH•H<sub>2</sub>O (710 mg, 2.06 mmol) at room temperature. The reaction mixture was stirred for 5 h at room temperature, after which the mixture was diluted with CH<sub>2</sub>Cl<sub>2</sub> and washed with saturated NaHCO<sub>3</sub> and brine. The organic layer was dried over Na<sub>2</sub>SO<sub>4</sub>, filtered, and concentrated in vacuo. The residue underwent column chromatography (silica gel, hexane:AcOEt = 4:1 to 2:1) to yield 6 as a colourless oil (1.36 g, 30% in two steps); <sup>1</sup>H NMR (600 MHz, CDCl<sub>3</sub>) δ 8.02 (d, *J* = 7.7 Hz, 2H), 7.97 (d, *J* = 7.7 Hz, 2H), 7.52–7.49 (m, 2H), 7.39 (dd, *J* = 7.7, 7.7 Hz, 2H), 7.37 (dd, *J* = 7.7, 7.7 Hz, 2H), 5.99 (dd, *J* = 9.6, 9.6 Hz, 1H), 5.85–5.78 (m, 1H), 5.29–5.25 (m, 2H), 5.13 (d, *J* =

10.7 Hz, 1H), 5.11 (dd,  $J = 3.5, 10.3$  Hz, 1H), 4.21 (dd,  $J = 6.8, 13.2$  Hz, 1H), 4.02 (dd,  $J = 4.0, 13.2$  Hz, 1H), 3.93–3.84 (m, 3H), 3.67 (dd,  $J = 9.6, 9.6$  Hz, 1H), 3.47 (s, 3H), 1.89 (dd,  $J = 4.3, 7.9$  Hz, 1H);  $^{13}\text{C}$  NMR (150 MHz,  $\text{CDCl}_3$ )  $\delta$  166.2, 165.8, 133.5, 133.4, 133.3, 130.0, 129.9, 129.8, 129.3, 128.6, 128.5, 117.8, 95.3, 77.9, 72.7, 72.3, 71.0, 68.8, 61.7, 60.7; HRMS (ESI): calculated for  $[\text{M}+\text{Na}]^+$  requires  $m/z = 465.1525$ , found 465.1522.

### Synthesis of 7

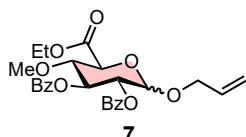

#### Step 1: Oxidation

AZADOL<sup>®</sup> (23.4 mg, 0.153 mmol; TCI Chemicals, Tokyo, Japan) was added to a mixture of **6** (1.35 g, 3.05 mmol) and  $\text{PhI}(\text{OAc})_2$  (2.16 g, 6.71 mmol) in  $\text{CH}_2\text{Cl}_2$  (8 mL) and 0.1 M phosphate buffer (pH 7.0, 8 mL) at 0°C. The reaction mixture was stirred for 2 h at 0°C, after which the mixture was diluted with  $\text{CH}_2\text{Cl}_2$  and washed with saturated  $\text{NaHCO}_3$  and brine. The organic layer was dried over  $\text{Na}_2\text{SO}_4$ , filtered, and concentrated *in vacuo*. The residue was used in the next step without purification.

#### Step 2: Esterification

Ethyl iodide (0.75 mL, 9.15 mmol) was added to a mixture of the above product and  $\text{KHCO}_3$  (1.53 g, 51.3 mmol) in DMF (7.8 mL) at room temperature. The reaction mixture was stirred for 5 h at room temperature, after which the mixture was diluted with EtOAc and washed with saturated  $\text{NaHCO}_3$  and brine. The organic layer was dried over  $\text{Na}_2\text{SO}_4$ , filtered, and concentrated *in vacuo*. The residue underwent column chromatography (silica gel, hexane:AcOEt = 4:1 to 2:1) to yield **7** as a colourless oil (820 mg, 55% in two steps);  $^1\text{H}$  NMR (600 MHz,  $\text{CDCl}_3$ )  $\delta$  8.01 (dd,  $J = 1.0, 8.2$  Hz, 2H), 7.97 (dd,  $J = 1.2, 8.2$  Hz, 2H), 7.53–7.49 (m, 2H), 7.40 (dd,  $J = 8.2, 8.2$  Hz, 2H), 7.37 (dd,  $J = 8.2, 8.2$  Hz, 2H), 5.98 (dd,  $J = 9.7, 9.7$  Hz, 1H), 5.85–5.79 (m, 1H), 5.32 (d,  $J = 3.7$  Hz, 1H), 5.29 (dddd,  $J = 1.3, 1.4, 1.4, 17.1$  Hz, 1H), 5.18 (dd,  $J = 3.5, 10.2$  Hz, 1H), 5.15 (dddd,  $J = 1.3, 1.4, 1.4, 10.4$  Hz, 1H), 4.35 (d,  $J = 9.7$  Hz, 1H), 4.31 (q,  $J = 7.1$  Hz, 2H), 4.27 (dddd,  $J = 1.4, 1.4, 5.0, 13.2$  Hz, 1H), 4.05 (dddd,  $J = 1.3, 1.3, 6.2, 13.2$  Hz, 1H), 3.85 (dd,  $J = 9.7, 9.7$  Hz, 1H), 3.42 (s, 3H), 1.36 (t,  $J = 7.1$  Hz, 3H);  $^{13}\text{C}$  NMR (150 MHz,  $\text{CDCl}_3$ )  $\delta$  169.3, 166.0, 165.7, 133.5, 133.4, 133.2, 130.0, 129.9, 129.7, 129.2, 128.6, 128.6, 118.2, 95.7, 79.6, 72.1, 71.8, 70.3, 69.1, 62.0, 60.5, 14.3; HRMS (ESI): calculated for  $[\text{M}+\text{Na}]^+$  requires  $m/z = 507.1631$ , found 507.1628.

### Synthesis of 8

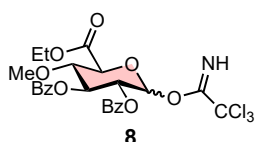



### Step 1: Allyl group removal

Under an N<sub>2</sub> atmosphere, PdCl<sub>2</sub> (356 mg, 2.01 mmol) was added to a mixture of **7** (810 mg, 1.67 mmol) and NaOAc (342 g, 4.18 mmol) in AcOH (18 mL) and H<sub>2</sub>O (1.8 mL) at room temperature. The reaction mixture was stirred for 48 h at room temperature, after which silica gel was added to the mixture. The volatile compounds were removed *in vacuo* and the resulting silica gel slurry underwent column chromatography (silica gel, hexane:AcOEt = 6:1 to 3:1) to yield the deprotected product (718 mg). Although this product contained small amounts of impurities, it was used in the next step without further purification.

### Step 2: Trichloroacetimidation

1,8-Diazabicyclo(5.4.0)undec-7-ene (DBU; 24 μL, 0.162 mmol) was added to a solution of the above compound (718 mg, ~1.62 mmol) and Cl<sub>3</sub>CCN (1.6 mL, 16.2 mmol) in CH<sub>2</sub>Cl<sub>2</sub> (16 mL) at 0°C. The reaction mixture was stirred at 0°C for 15 min and then warmed to room temperature. The reaction mixture was stirred again for 4 h at room temperature and then concentrated *in vacuo*. The residue underwent short column chromatography (silica gel, hexane:AcOEt = 4:1 to 2:1 + 1% Et<sub>3</sub>N) to yield **7** as a white foam (234 mg). After column purification, the resulting product was used immediately in the next reaction due to its instability.

### Synthesis of **9**

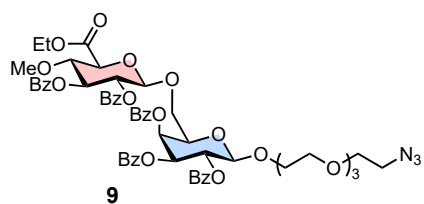

Under an N<sub>2</sub> atmosphere, TMSOTf (15 μL, 16.3 mmol) was added to a mixture of **2** (520 mg, 0.750 mmol) and **8** (234 mg, 0.419 mmol) in CH<sub>2</sub>Cl<sub>2</sub> (4 mL) at -20°C. This reaction mixture was stirred at -20°C for 3 h and then allowed to slowly warm to room temperature. The reaction mixture was stirred for 6 h at room temperature and then quenched with

an excess amount of Et<sub>3</sub>N and finally concentrated. The residue underwent column chromatography (silica gel, hexane:AcOEt = 4:1 to 2:1 to 1:1) to yield **9** as a colourless foam (294 mg, 63%); <sup>1</sup>H NMR (600 MHz, CDCl<sub>3</sub>) δ 8.05 (dd, *J* = 1.3, 8.3 Hz, 2H), 7.97 (dd, *J* = 1.3, 8.3 Hz, 2H), 7.94–7.92 (m, 4H), 7.74 (dd, *J* = 1.0, 8.2 Hz, 2H), 7.62–7.59 (m, 1H), 7.52–7.46 (m, 5H), 7.42–7.35 (m, 7H), 7.21 (t, *J* = 8.2 Hz, 2H), 5.80 (dd, *J* = 0.8, 3.4 Hz, 1H), 5.66 (dd, *J* = 7.9, 10.4 Hz, 1H), 5.60 (dd, *J* = 9.2, 9.2 Hz, 1H), 5.47 (dd, *J* = 3.4, 10.4 Hz, 1H), 5.38 (dd, *J* = 7.3, 9.2 Hz, 1H), 4.81 (d, *J* = 7.3 Hz, 1H), 4.72 (d, *J* = 7.9 Hz, 1H), 4.24–4.19 (m, 2H), 4.10 (ddd, *J* = 0.8, 3.4, 7.7 Hz, 1H), 4.05 (dd, *J* = 3.4, 10.9 Hz, 1H), 4.02 (d, *J* = 9.5 Hz, 1H), 3.91 (dd, *J* = 9.2, 9.5 Hz, 1H), 3.79 (dd, *J* = 7.7, 10.9 Hz, 1H), 3.65–3.63 (m, 3H), 3.59–3.58 (m, 2H), 3.51–3.45 (m, 3H), 3.40–3.30 (m, 11H), 1.27 (t, *J* = 7.1 Hz, 3H); <sup>13</sup>C NMR (150 MHz, CDCl<sub>3</sub>) δ 168.1, 165.7, 165.6, 165.6, 165.3, 165.2, 133.6, 133.5, 133.4, 133.3, 133.3, 130.2, 129.9, 129.9, 129.8, 129.8, 129.6, 129.3, 129.2, 129.0, 128.7, 128.6, 128.5, 128.5, 128.4, 101.4, 101.3, 79.2, 74.4, 74.3, 73.4, 72.0, 71.8, 70.7, 70.7, 70.6, 70.3, 70.1, 69.9, 69.4, 69.0, 68.8, 62.0, 60.6, 50.8, 14.2; HRMS (ESI): calculated for [M+Na]<sup>+</sup> requires *m/z* = 1142.3746, found 1142.3733.

### General click reaction procedure for the preparation of 10–12

Under an N<sub>2</sub> atmosphere, sodium ascorbate (80 mol %) was added to a mixture of **9** (2.1–4.2 eq.), alkyne linker (1 eq.), CuSO<sub>4</sub> (20 mol %), and Tris[(1-benzyl-1H-1,2,3-triazol-4-yl)methyl]amine (TBTA; 40 mol %) in tetrahydrofuran (THF) and H<sub>2</sub>O at room temperature. This reaction mixture was stirred at room temperature for 18 h, diluted with CH<sub>2</sub>Cl<sub>2</sub>, and washed with H<sub>2</sub>O and brine. The organic layer was dried over Na<sub>2</sub>SO<sub>4</sub>, filtered, and concentrated *in vacuo*. The residue underwent preparative TLC (silica gel, CHCl<sub>3</sub>:MeOH = 10:1) to afford **10–12**.

### Synthesis of 10

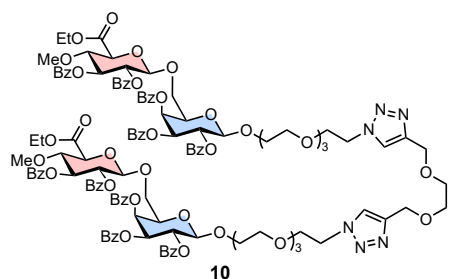

The reaction was performed with **9** (34.8 mg, 31.0 μmol), bis-alkyne linker (2 mg, 14.8 μmol), CuSO<sub>4</sub> (0.5 mg, 2.96 μmol), sodium ascorbate (2.3 mg, 11.8 μmol), TBTA (3.1 mg, 5.92 μmol) in THF (1 mL) and H<sub>2</sub>O (0.2 mL). After the above-described purification, compound **10** was afforded as a colourless oil (23.0 mg, 65%); <sup>1</sup>H NMR (600 MHz, CDCl<sub>3</sub>) δ 8.04 (dd, *J* = 1.3, 8.3 Hz, 4H), 7.96 (dd, *J* = 1.3, 8.3 Hz, 4H),

7.93–7.90 (m, 8H), 7.73 (d, *J* = 1.1, 8.3 Hz, 4H), 7.70 (s, 2H), 7.61–7.58 (m, 2H), 7.52–7.44 (m, 10H), 7.41–7.32 (m, 14H), 7.21 (t, *J* = 8.3 Hz, 4H), 5.80 (dd, *J* = 0.7, 3.4 Hz, 2H), 5.66 (dd, *J* = 7.9, 10.4 Hz, 2H), 5.60 (dd, *J* = 9.2, 9.2 Hz, 2H), 5.47 (dd, *J* = 3.4, 10.4 Hz, 2H), 5.37 (dd, *J* = 7.3, 9.2 Hz, 2H), 4.81 (d, *J* = 7.3 Hz, 2H), 4.72 (d, *J* = 7.9 Hz, 2H), 4.65 (s, 4H), 4.49 (t, *J* = 5.4 Hz, 4H), 4.23–4.18 (m, 4H), 4.11 (dd, *J* = 3.4, 7.7 Hz, 2H), 4.04 (dd, *J* = 3.4, 10.9 Hz, 2H), 4.01 (d, *J* = 9.5 Hz, 2H), 3.90 (dd, *J* = 9.2, 9.5 Hz, 2H), 3.81 (t, *J* = 5.4 Hz, 4H), 3.78 (dd, *J* = 7.7, 10.9 Hz, 2H), 3.68 (s, 4H), 3.66–3.63 (m, 2H), 3.52–3.50 (m, 4H), 3.48–3.42 (m, 6H), 3.40–3.32 (m, 14H), 3.28–3.26 (m, 4H), 1.26 (t, *J* = 7.1 Hz, 6H); <sup>13</sup>C NMR (150 MHz, CDCl<sub>3</sub>) δ 168.0, 165.6, 165.5, 165.3, 165.2, 144.9, 133.6, 133.5, 133.4, 133.3, 130.1, 129.9, 129.9, 129.8, 129.8, 129.6, 129.3, 129.3, 129.2, 128.8, 128.7, 128.6, 128.5, 128.5, 128.4, 123.9, 101.4, 101.3, 79.1, 74.5, 74.3, 73.3, 72.0, 71.8, 70.7, 70.6, 70.5, 70.4, 70.2, 69.9, 69.7, 69.5, 69.3, 69.0, 68.8, 64.7, 62.0, 60.6, 50.3, 14.2; HRMS (ESI): calculated for [M+2H]<sup>2+</sup> requires *m/z* = 1189.9283, found 1189.9282.

## Synthesis of 11

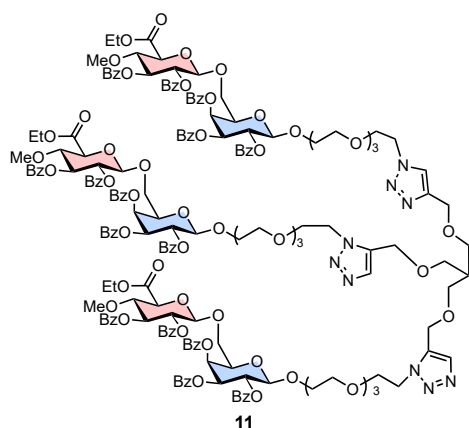

The reaction was performed with **9** (35.5 mg, 31.7  $\mu\text{mol}$ ), tris-alkyne linker (2.2 mg, 10.6  $\mu\text{mol}$ ),  $\text{CuSO}_4$  (0.51 mg, 3.18  $\mu\text{mol}$ ), sodium ascorbate (2.5 mg, 12.7  $\mu\text{mol}$ ), and TBTA (3.4 mg, 6.36  $\mu\text{mol}$ ) in THF (1 mL) and  $\text{H}_2\text{O}$  (0.2 mL). After the above-described purification, compound **11** was afforded as a colourless oil (24.3 mg, 64%);  $^1\text{H}$  NMR (600 MHz,  $\text{CDCl}_3$ )  $\delta$  8.04 (dd,  $J = 1.3, 8.3$  Hz, 6H), 7.96 (dd,  $J = 1.3, 8.3$  Hz, 6H), 7.93–7.90 (m, 12H), 7.73 (dd,  $J = 1.1, 8.3$  Hz, 6H), 7.67 (s, 3H), 7.61–7.58 (m, 3H), 7.52–7.44 (m, 15H), 7.41–7.32 (m, 21H), 7.21 (t,  $J = 8.3$  Hz, 6H), 5.80 (dd,  $J = 0.8, 3.5$  Hz, 3H), 5.66 (dd,  $J = 8.0, 10.4$  Hz, 3H), 5.60 (dd,  $J = 9.2, 9.2$  Hz, 3H), 5.47 (dd,  $J = 3.5, 10.4$  Hz, 3H), 5.37 (dd,  $J = 7.3, 9.2$  Hz, 3H), 4.81 (d,  $J = 7.3$  Hz, 3H), 4.72 (d,  $J = 7.9$  Hz, 3H), 4.54 (s, 6H), 4.49 (t,  $J = 5.3$  Hz, 6H), 4.22–4.18 (m, 6H), 4.11 (dd,  $J = 3.4, 7.6$  Hz, 3H), 4.04 (dd,  $J = 3.4, 11.0$  Hz, 3H), 4.02 (d,  $J = 9.4$  Hz, 3H), 3.90 (dd,  $J = 9.2, 9.4$  Hz, 3H), 3.81 (t,  $J = 5.3$  Hz, 6H), 3.78 (dd,  $J = 7.6, 11.0$  Hz, 3H), 3.66–3.63 (m, 3H), 3.54 (d,  $J = 5.9$  Hz, 6H), 3.52–3.50 (m, 6H), 3.46–3.42 (m, 9H), 3.39–3.32 (m, 21H), 3.27–3.25 (m, 6H), 2.22–2.17 (m, 1H), 1.26 (t,  $J = 7.1$  Hz, 9H);  $^{13}\text{C}$  NMR (150 MHz,  $\text{CDCl}_3$ )  $\delta$  168.1, 165.7, 165.6, 165.3, 165.2, 145.0, 133.7, 133.5, 133.4, 133.3, 130.2, 129.9, 129.9, 129.8, 129.8, 129.6, 129.3, 129.3, 129.2, 129.0, 128.7, 128.6, 128.6, 128.5, 128.4, 123.8, 101.4, 101.3, 79.2, 74.5, 74.3, 73.3, 72.0, 71.9, 70.7, 70.5, 70.5, 70.4, 70.2, 70.0, 69.5, 69.4, 69.0, 68.9, 68.8, 64.7, 62.0, 60.6, 50.3, 40.4, 14.2; HRMS (ESI): calculated for  $[\text{M}+2\text{H}]^{2+}$  requires  $m/z = 1791.1433$ , found 1791.1451.

## Synthesis of 12

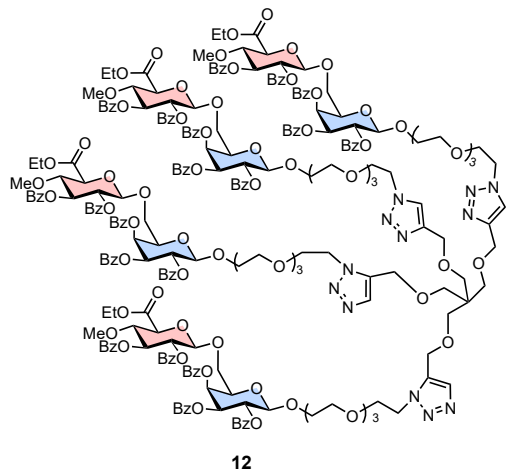

The reaction was performed with **9** (37.8 mg, 33.7  $\mu\text{mol}$ ), tetra-alkyne linker (2.3 mg, 8.03  $\mu\text{mol}$ ),  $\text{CuSO}_4$  (0.51 mg, 3.21  $\mu\text{mol}$ ), sodium ascorbate (2.5 mg, 12.8  $\mu\text{mol}$ ), and TBTA (3.4 mg, 6.42  $\mu\text{mol}$ ) in THF (2 mL) and  $\text{H}_2\text{O}$  (0.4 mL). After the above-described purification, compound **12** was afforded as a colourless oil (23.8 mg, 62%);  $^1\text{H}$  NMR (600 MHz,  $\text{CDCl}_3$ )  $\delta$  8.04 (dd,  $J = 1.3, 8.4$  Hz, 8H), 7.96 (dd,  $J = 1.3, 8.4$  Hz, 8H), 7.93–7.89 (m, 16H), 7.73 (dd,  $J = 1.2, 8.4$  Hz, 8H), 7.66 (s, 4H), 7.61–7.58 (m, 4H), 7.52–7.44 (m, 20H), 7.41–7.31 (m, 28H), 7.20 (t,  $J = 8.4$  Hz, 8H), 5.80 (dd,  $J = 0.6, 3.6$  Hz, 4H), 5.66 (dd,  $J = 8.0, 10.4$  Hz, 4H), 5.60 (dd,  $J = 9.2, 9.2$  Hz, 4H), 5.47 (dd,  $J = 3.5, 10.4$  Hz, 4H), 5.37 (dd,  $J = 7.3, 9.2$  Hz, 4H), 4.81 (d,  $J = 7.3$  Hz, 4H), 4.72 (d,  $J = 7.9$  Hz, 4H), 4.51 (s, 8H), 4.47 (t,  $J = 5.3$  Hz, 8H), 4.22–4.18 (m, 8H), 4.11 (dd,  $J = 3.5, 7.7$  Hz, 4H), 4.05 (dd,  $J = 3.5, 11.0$  Hz, 4H), 4.01 (d,  $J = 9.5$  Hz, 4H), 3.90 (dd,  $J = 9.2, 9.5$  Hz, 4H), 3.81 (t,  $J = 5.3$  Hz, 8H), 3.78 (dd,  $J = 7.7, 11.0$  Hz, 4H), 3.66–3.63 (m, 4H), 3.52–3.50 (m, 8H), 3.47–3.44 (m, 12H), 3.42–3.40 (m, 8H), 3.39–3.33 (m, 28H), 3.25–3.23 (m, 8H), 1.26 (t,  $J = 7.1$  Hz, 12H);  $^{13}\text{C}$  NMR (150 MHz,  $\text{CDCl}_3$ )  $\delta$  168.0, 165.6, 165.6, 165.3, 165.2, 145.0, 133.7, 133.5, 133.4, 133.3, 130.2, 129.9,

129.9, 129.8, 129.8, 129.6, 129.3, 129.3, 129.2, 129.0, 128.7, 128.6, 128.6, 128.5, 128.4, 123.8, 101.4, 101.3, 79.2, 74.5, 74.3, 73.3, 72.0, 71.8, 70.7, 70.5, 70.5, 70.4, 70.2, 69.9, 69.5, 69.4, 69.0, 68.9, 68.8, 65.0, 62.0, 60.6, 50.2, 45.4, 14.2; calculated for  $[M+3H]^{3+}$  requires  $m/z = 1590.5696$ , found 1590.5668.

### General hydrolysis reaction procedure for the preparation of multivalent AMORs

To a mixture of 10–12 (1 eq.) in THF, MeOH, and H<sub>2</sub>O was added LiOH•H<sub>2</sub>O (12–36 eq.). The reaction was monitored by LC–MS or MALDI-TOF MS. After completion of the reaction, the mixture was quenched with AcOH and the pH was adjusted to 4~5. The mixture was concentrated, and the residue underwent preparative TLC (C8-modified silica gel, 5% CH<sub>3</sub>CN/H<sub>2</sub>O) and subsequent column chromatography (Sephadex™ LH-20, MeOH) to yield multivalent AMORs. These compounds were characterised via <sup>1</sup>H NMR and mass spectroscopy.

#### AMOR dimer

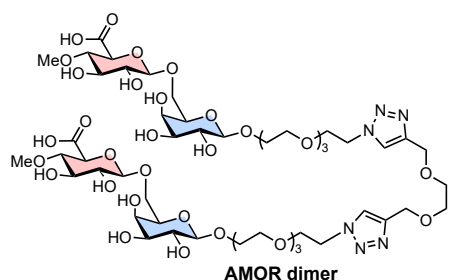

The reaction was performed with **10** (20.0 mg, 8.90 μmol) and LiOH•H<sub>2</sub>O (4.4 mg, 105 μmol) in THF (0.2 mL), MeOH (0.2 mL), and H<sub>2</sub>O (0.2 mL). After the above-described purification, **AMOR dimer** was afforded as a colourless oil (6.2 mg, 58%); <sup>1</sup>H NMR (600 MHz, D<sub>2</sub>O) δ □ 8.00 (s, 2H), 4.59 (s, 4H), 4.56 (t, *J* = 5.1 Hz, 4H), 4.38 (d, *J* = 7.9 Hz, 2H), 4.32 (d, *J* = 7.9 Hz, 2H), 3.97 (ddd, *J* = 4.1, 4.1, 11.7 Hz, 2H), 3.95–3.91 (m, 2H), 3.89 (t, *J* = 5.1 Hz, 4H), 3.85 (d, *J* = 3.4 Hz, 2H), 3.80–3.76 (m, 4H), 3.74–3.71 (m, 2H), 3.65–3.63 (m, 8H), 3.60 (d, *J* = 9.8 Hz, 2H), 3.58–3.55 (m, 10H), 3.54–3.51 (m, 8H), 3.46–3.42 (m, 4H), 3.39 (s, 6H), 3.26 (dd, *J* = 8.0, 9.2 Hz, 2H), 3.19 (dd, *J* = 9.5, 9.5 Hz, 2H); MS (ESI): calculated for  $[M+H]^+$  requires  $m/z = 1281.5$ , found 1280.7.

#### AMOR trimer

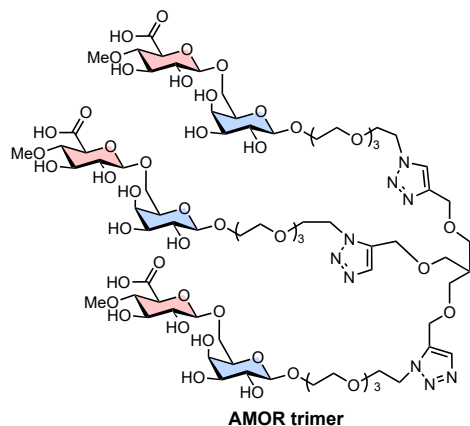

The reaction was performed with **11** (24.3 mg, 6.78 μmol) and LiOH•H<sub>2</sub>O (5.1 mg, 122 μmol) in THF (0.3 mL), MeOH (0.3 mL) and H<sub>2</sub>O (0.3 mL). After stirring for 6 h, LiOH•H<sub>2</sub>O (3.0 mg, 71.4 μmol) was added to complete the reaction. The mixture was further stirred for 24 h. After the above-described purification, **AMOR trimer** was afforded as a colourless oil (3.4 mg, 26%); <sup>1</sup>H NMR (600 MHz, D<sub>2</sub>O) δ □ 7.96 (s, 3H), 4.54 (t, *J* = 5.2 Hz, 6H), 4.50 (s, 6H), 4.38 (d, *J* = 7.9 Hz, 3H), 4.31 (d, *J* = 7.9 Hz, 3H), 3.97 (dt, *J* = 4.2, 11.7 Hz, 3H), 3.95–3.91 (m, 3H), 3.88 (t, *J* = 5.1 Hz, 6H), 3.86 (d, *J* = 3.5 Hz, 3H), 3.80–3.76 (m, 6H), 3.74–3.71 (m, 3H), 3.64 (t, *J* = 4.1 Hz, 6H), 3.60 (d, *J* = 9.8 Hz, 3H), 3.58–3.54 (m, 15H), 3.53–3.51 (m, 12H), 3.46–3.42 (m, 12H), 3.39 (s, 9H), 3.26 (dd, *J* = 7.9, 9.4 Hz, 3H), 3.19 (dd, *J* =

9.4, 9.4 Hz, 3H), 2.11–2.07 (m, 1H); MS (MALDI): calculated for  $[M+H]^+$  requires  $m/z = 1934.8$ , found 1935.5.

### AMOR tetramer

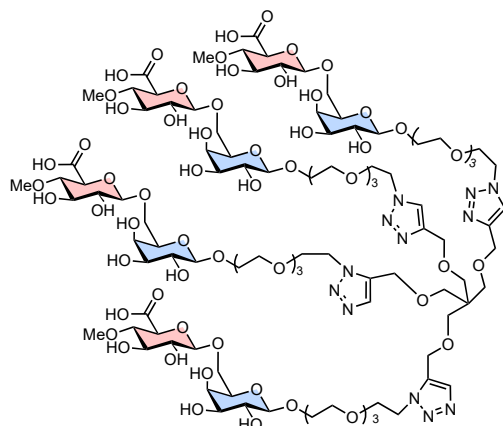

AMOR tetramer

The reaction was performed with **12** (23.8 mg, 4.99  $\mu\text{mol}$ ) and  $\text{LiOH}\cdot\text{H}_2\text{O}$  (5.1 mg, 122  $\mu\text{mol}$ ) in THF (0.3 mL), MeOH (0.3 mL) and  $\text{H}_2\text{O}$  (0.3 mL). After stirring for 6 h, additional  $\text{LiOH}\cdot\text{H}_2\text{O}$  (6.0 mg, 143  $\mu\text{mol}$ ) was added to complete the reaction. The mixture was further stirred for 48 h. After the above-described purification, **AMOR tetramer** was afforded as a colourless oil (2.8 mg, 22%);  $^1\text{H}$  NMR (600 MHz,  $\text{D}_2\text{O}$ )  $\delta$  7.91 (s, 4H), 4.51 (t,  $J = 5.2$  Hz, 8H), 4.44 (s, 8H), 4.38 (d,  $J = 7.9$  Hz, 4H), 4.32 (d,  $J = 7.9$  Hz, 4H), 3.97 (dt,  $J = 4.2, 11.8$  Hz, 4H), 3.95–3.91 (m, 4H), 3.87–3.86 (m, 12H), 3.79–3.76 (m, 8H), 3.74–3.71 (m, 4H), 3.63 (d,  $J = 4.2$  Hz, 8H), 3.60 (d,  $J = 9.8$  Hz, 4H), 3.58–3.55 (m, 12H), 3.54–3.50 (m, 24H), 3.45–3.43 (m, 8H), 3.39 (s, 12H), 3.30 (s, 8H), 3.26 (dd,  $J = 7.9, 9.4$  Hz, 4H), 3.19 (dd,  $J = 9.4, 9.4$  Hz, 4H); MS (MALDI): calculated for  $[M+H]^+$  requires  $m/z = 2574.0$ , found 2574.6.

2: <sup>1</sup>H NMR (500 MHz, CDCl<sub>3</sub>)

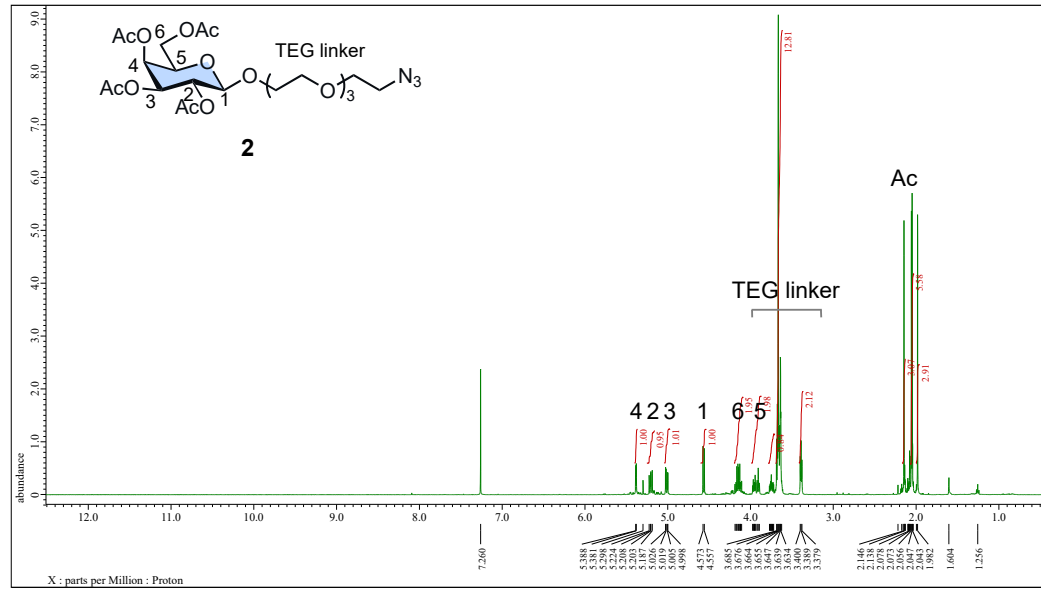

2: <sup>13</sup>C NMR (125 MHz, CDCl<sub>3</sub>)

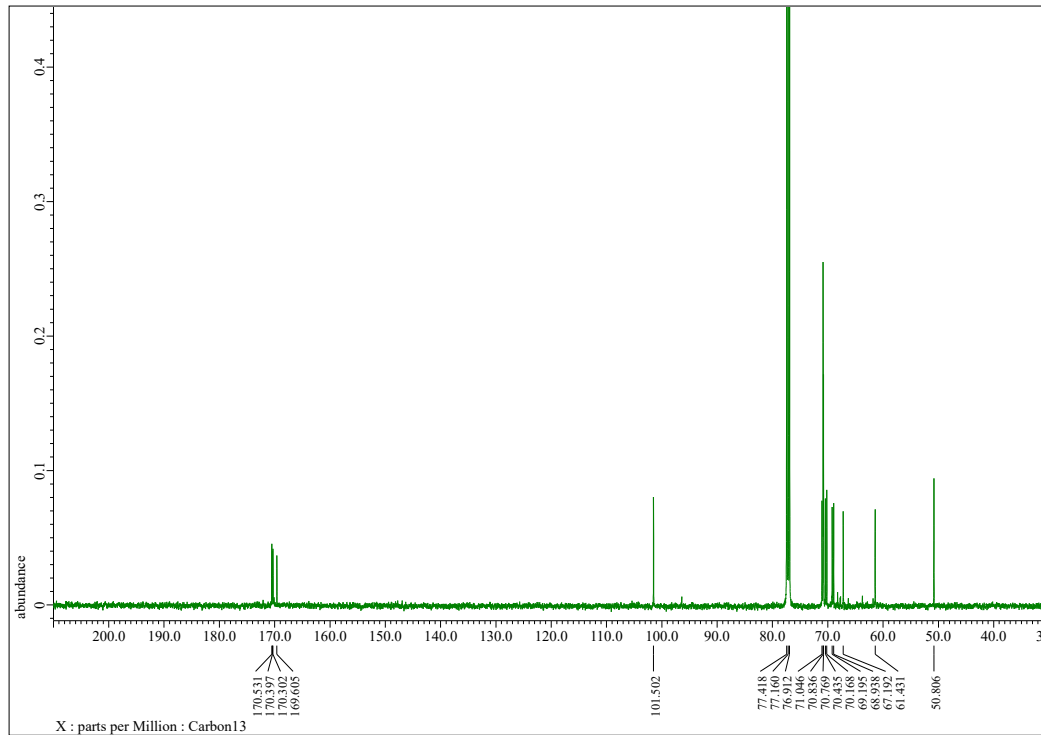

3: <sup>1</sup>H NMR (600 MHz, CDCl<sub>3</sub>)

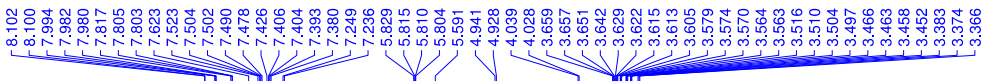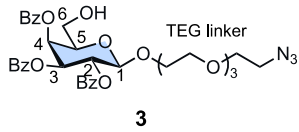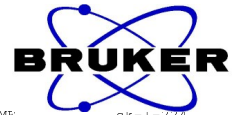

```

NAME          sk-1-224
EXPNO         1
PROCNO        1
Date_         20190423
Time          16.27
INSTRUM       spect
PROBHD        5 mm TXI 1H/2H
PULPROG       zg30
TD            65536
SOLVENT       CDCl3
NS            16
DS            2
SWH           12376.237 Hz
FIDRES        0.188846 Hz
AQ            2.6477449 sec
RG            362
DW            40.400 usec
DE            6.50 usec
TE            298.0 K
D1            1.00000000 sec
TD0           1
    
```

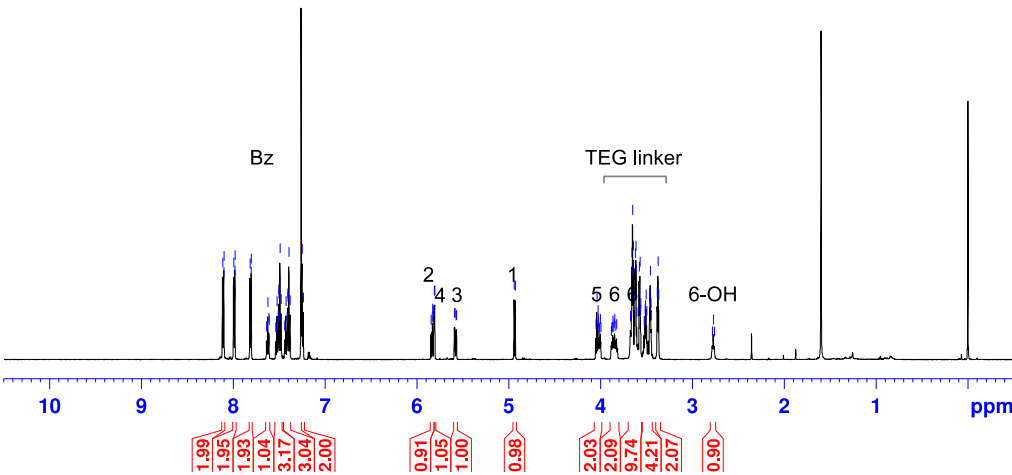

```

===== CHANNEL f1 =====
NUC1          1H
P1            8.00 usec
PL1           -1.00 dB
PL1W          31.62277603 W
SFO1          600.1337060 MHz
SI            32768
SF            600.1300110 MHz
WDW           EM
SSB           0
LB            0.30 Hz
GB            0
PC            1.00
    
```

3: <sup>13</sup>C NMR (150 MHz, CDCl<sub>3</sub>)

1D 13C

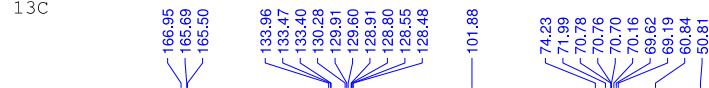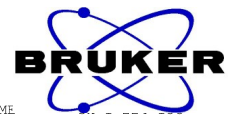

```

NAME          -----
EXPNO         1
PROCNO        1
Date_         20190423
Time          22.08
INSTRUM       spect
PROBHD        5 mm TXI 1H/2H
PULPROG       zgpg30
TD            65536
SOLVENT       CDCl3
NS            15000
DS            4
SWH           35971.223 Hz
FIDRES        0.548877 Hz
AQ            0.9110143 sec
RG            23170.5
DW            13.900 usec
DE            6.50 usec
TE            298.0 K
D1            2.00000000 sec
D11           0.03000000 sec
TD0           1
    
```

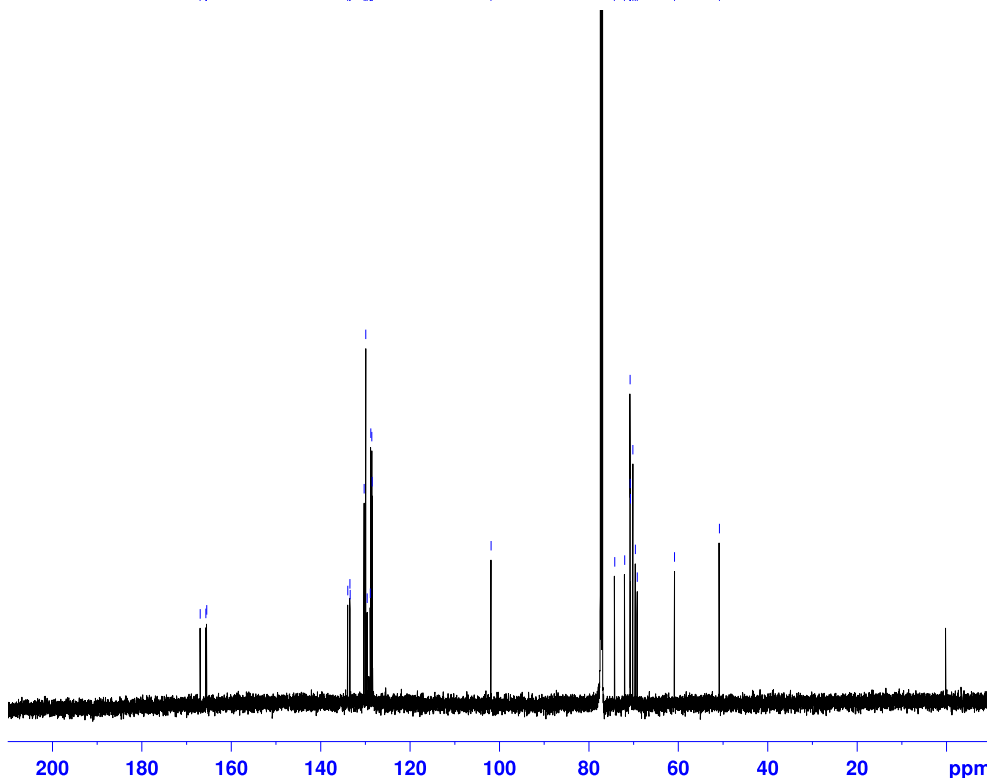

```

===== CHANNEL f1 =====
NUC1          13C
P1            15.00 usec
PL1           -1.90 dB
PL1W          194.52256775 W
SFO1          150.9178988 MHz

===== CHANNEL f2 =====
CPDPRG2       waltz16
NUC2          1H
PCPD2         100.00 usec
PL2           120.00 dB
PL12          20.96 dB
PL13          20.96 dB
PL2W          0.00000000 W
PL12W         0.20137247 W
PL13W         0.20137247 W
SFO2          600.1324005 MHz
SI            32768
SF            150.9027868 MHz
WDW           EM
SSB           0
LB            1.00 Hz
GB            0
PC            1.40
    
```

5: <sup>1</sup>H NMR (600 MHz, CDCl<sub>3</sub>)

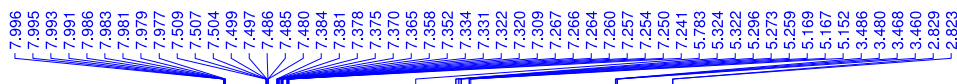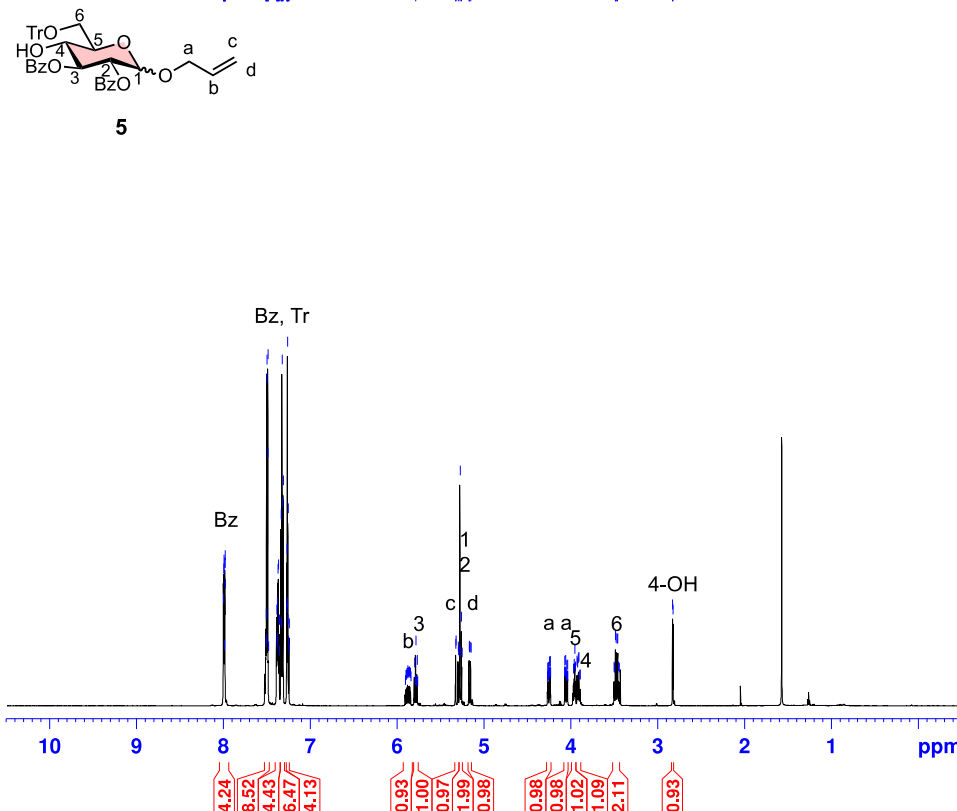

5: <sup>13</sup>C NMR (150 MHz, CDCl<sub>3</sub>)

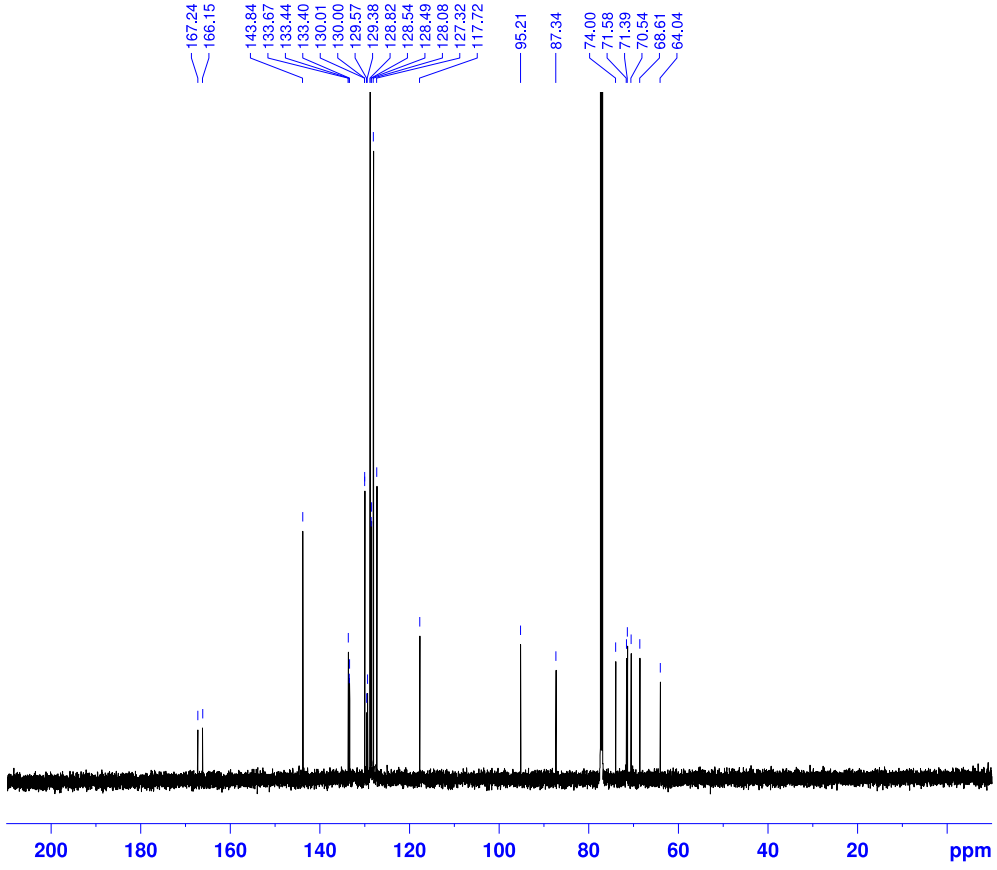

NAME  
EXPN  
PROC  
Date  
Time  
INST  
PROB  
PULP  
TD  
SOLV  
NS  
DS  
SWH  
FIDR  
AQ  
RG  
DW  
DE  
TE  
D1  
D11  
TD0  
====  
NUC1  
P1  
PL1  
PL1W  
SF01  
====  
CPDP  
NUC2  
F0P0  
PL2  
PL12  
PL13  
PL2W  
PL12  
PL13  
SF02  
SI  
SF  
WDW  
SSB  
LB  
GB  
FC



6: <sup>1</sup>H NMR (600 MHz, CDCl<sub>3</sub>)

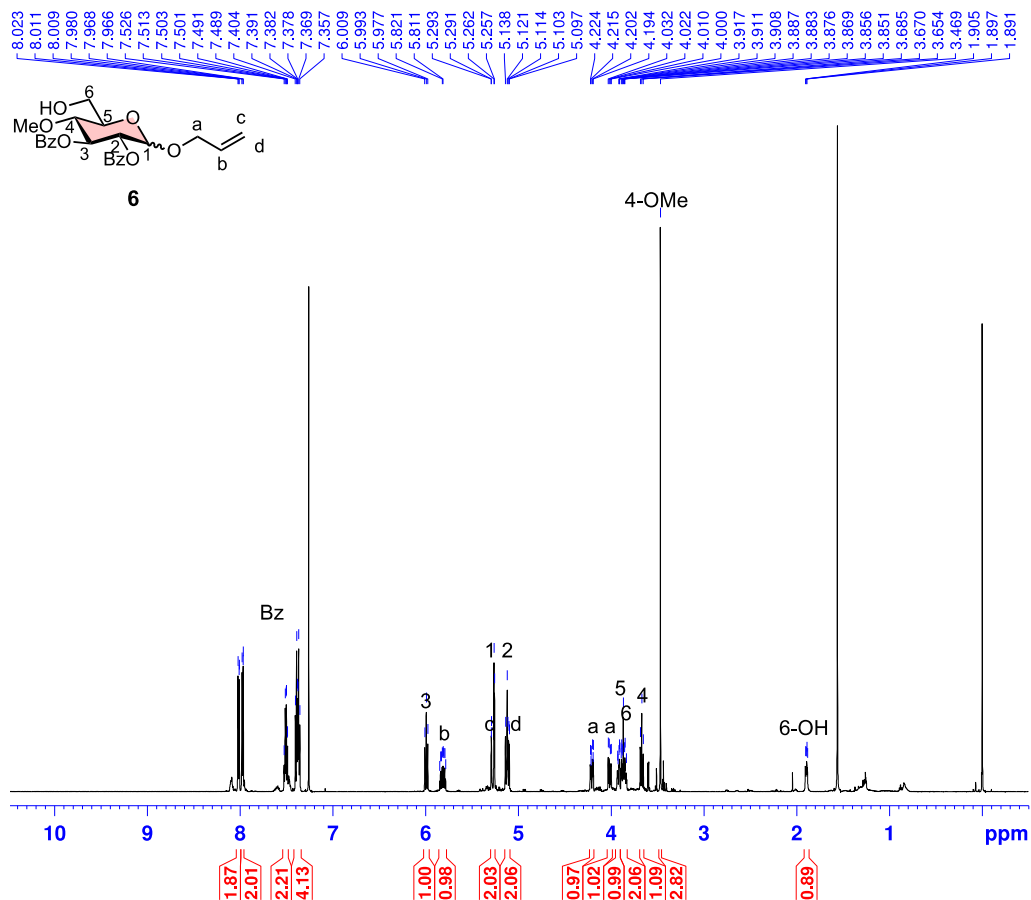

6: <sup>13</sup>C NMR (150 MHz, CDCl<sub>3</sub>)

1D 13C

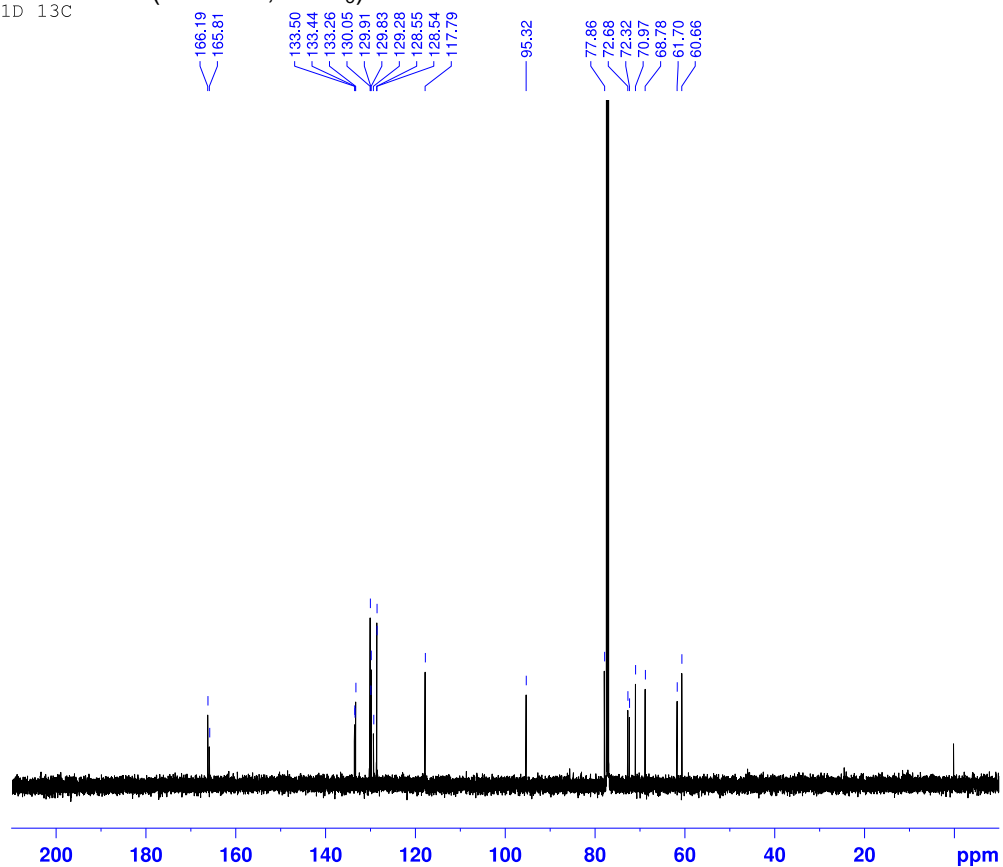



7: <sup>1</sup>H NMR (600 MHz, CDCl<sub>3</sub>)

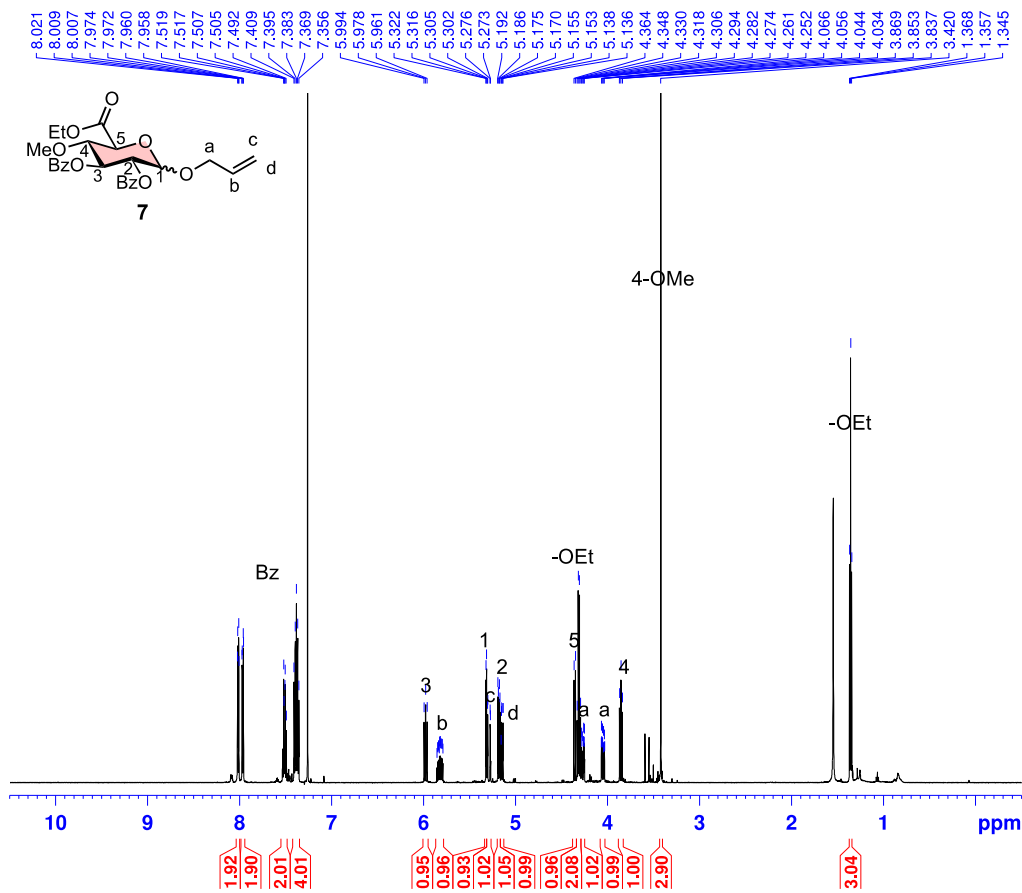

7: <sup>13</sup>C NMR (150 MHz, CDCl<sub>3</sub>)

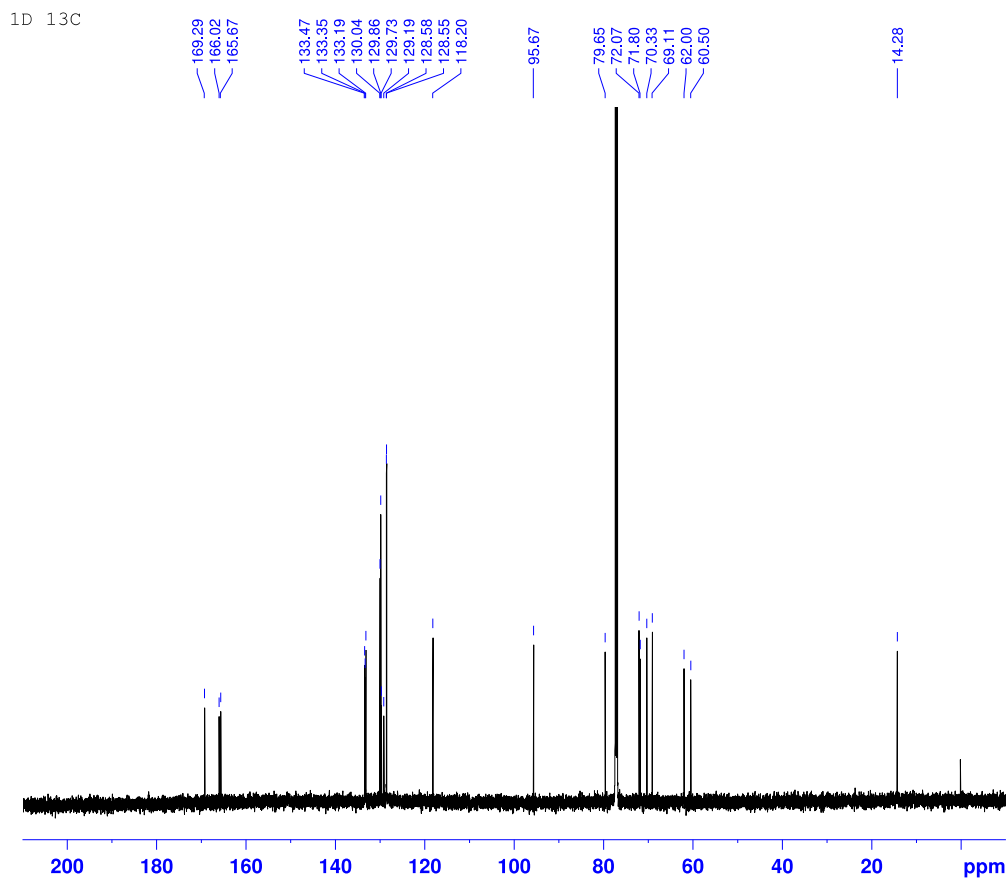

**9: <sup>1</sup>H NMR (600 MHz, CDCl<sub>3</sub>)**

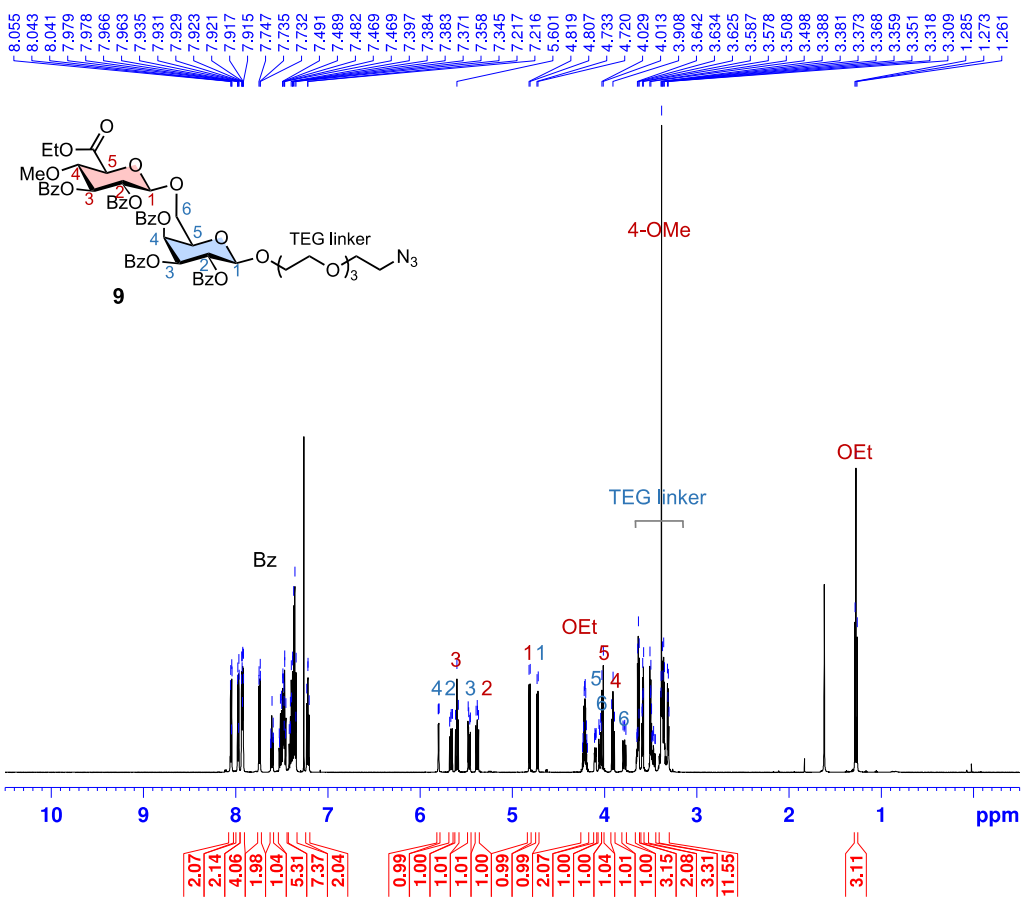

**9: <sup>13</sup>C NMR (150 MHz, CDCl<sub>3</sub>)**

1D 13C

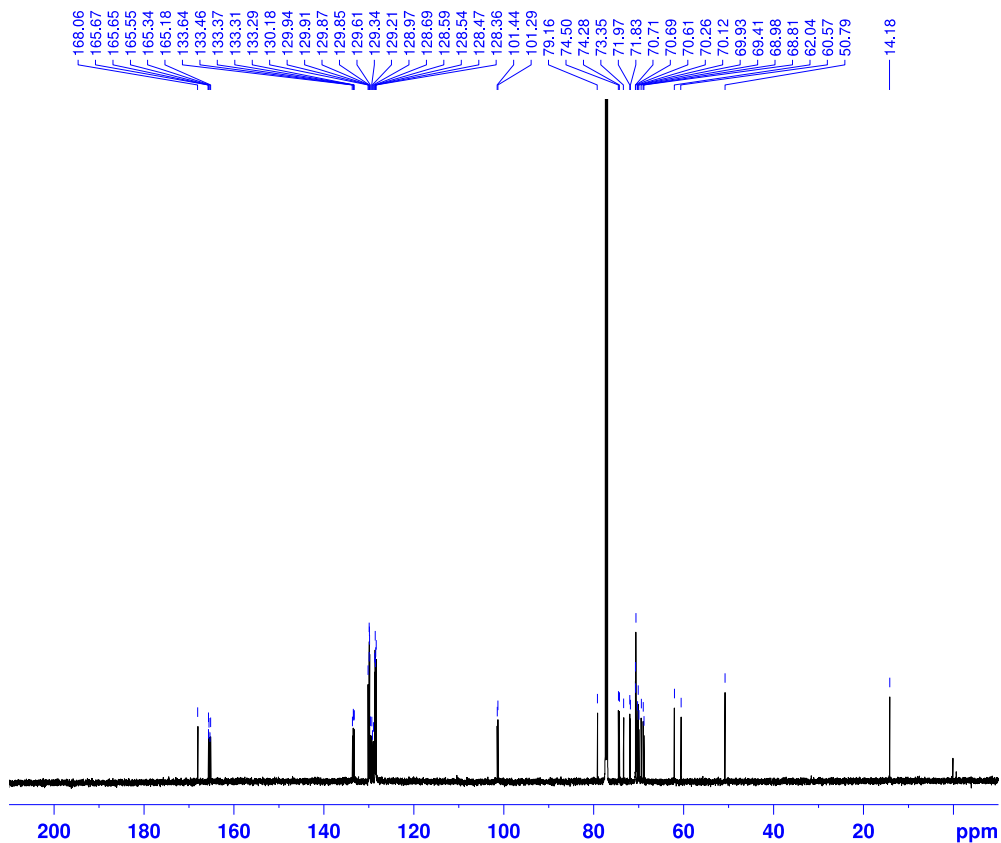

9: COSY (CDCl<sub>3</sub>)

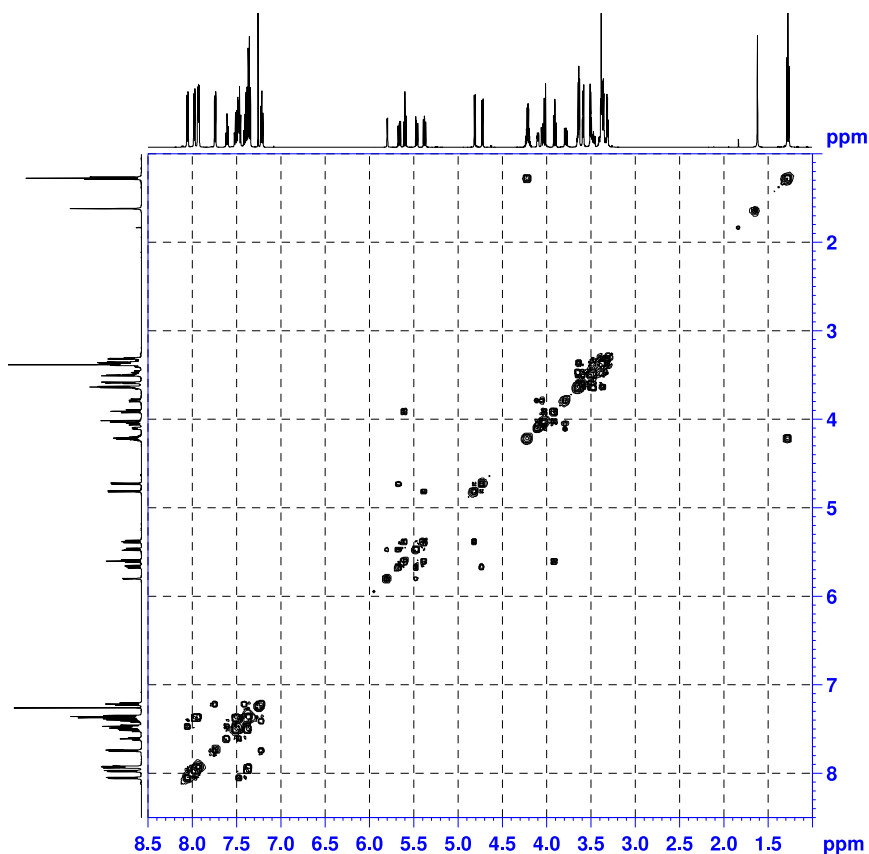

**BRUKER**

NAME sk-1-226  
 EXPNO  
 PROCNO  
 Date\_ 201  
 Time  
 INSTRUM 5 mm TXI  
 PROBHD cos  
 PULPROG  
 TD  
 SOLVENT  
 NS  
 DS  
 SWH 801  
 FIDRES 3.9  
 AQ 0.12  
 RG  
 DW 6  
 DE  
 TE  
 D0 0.000  
 D1 1.486  
 D13 0.000  
 D16 0.000  
 IN0 0.000

===== CHANNEL f

NUC1  
 P0  
 P1  
 PL1  
 PL1W 31.622  
 SF01 600.13

===== GRADIENT CH

GP1  
 GP2  
 GP3  
 GP4  
 GP5  
 GP6  
 GP7  
 GP8  
 GP9  
 GP10  
 GP11  
 GP12  
 GP13  
 GP14  
 GP15  
 GP16  
 GP17  
 GP18  
 GP19  
 GP20  
 GP21  
 GP22  
 GP23  
 GP24  
 GP25  
 GP26  
 GP27  
 GP28  
 GP29  
 GP30  
 GP31  
 GP32  
 GP33  
 GP34  
 GP35  
 GP36  
 GP37  
 GP38  
 GP39  
 GP40  
 GP41  
 GP42  
 GP43  
 GP44  
 GP45  
 GP46  
 GP47  
 GP48  
 GP49  
 GP50  
 GP51  
 GP52  
 GP53  
 GP54  
 GP55  
 GP56  
 GP57  
 GP58  
 GP59  
 GP60  
 GP61  
 GP62  
 GP63  
 GP64  
 GP65  
 GP66  
 GP67  
 GP68  
 GP69  
 GP70  
 GP71  
 GP72  
 GP73  
 GP74  
 GP75  
 GP76  
 GP77  
 GP78  
 GP79  
 GP80  
 GP81  
 GP82  
 GP83  
 GP84  
 GP85  
 GP86  
 GP87  
 GP88  
 GP89  
 GP90  
 GP91  
 GP92  
 GP93  
 GP94  
 GP95  
 GP96  
 GP97  
 GP98  
 GP99

9: ROESY (CDCl<sub>3</sub>)

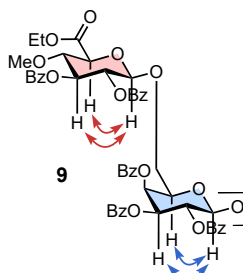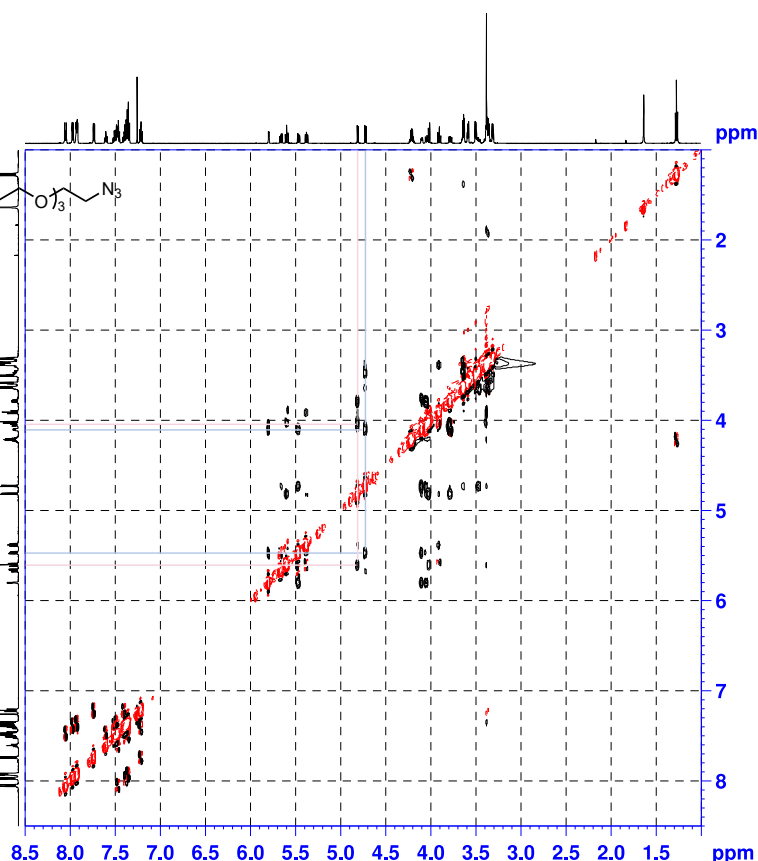

**BRUKER**

NAME sk-1-226  
 EXPNO  
 PROCNO  
 Date\_ 201  
 Time  
 INSTRUM 5 mm TXI  
 PROBHD r  
 PULPROG  
 TD  
 SOLVENT  
 NS  
 DS  
 SWH 612  
 FIDRES 2.5  
 AQ 0.16  
 RG  
 DW 8  
 DE  
 TE  
 D0 0.000  
 D1 2.000  
 D12 0.000  
 IN0 0.000

===== CHANNEL 1

NUC1  
 P1  
 P15 2000  
 PL1  
 PL11  
 PL11W 31.622  
 SF 600.13  
 SF01 600.13  
 TD  
 SF01 600  
 FIDRES 23.9  
 SW  
 FmMODE States  
 SI  
 SF 600.13  
 WDW  
 SSB  
 LB  
 GB  
 PC  
 SI  
 MC2 States  
 SF 600.13  
 WDW  
 SSB  
 LB  
 GB

9: HSQC (CDCl<sub>3</sub>)

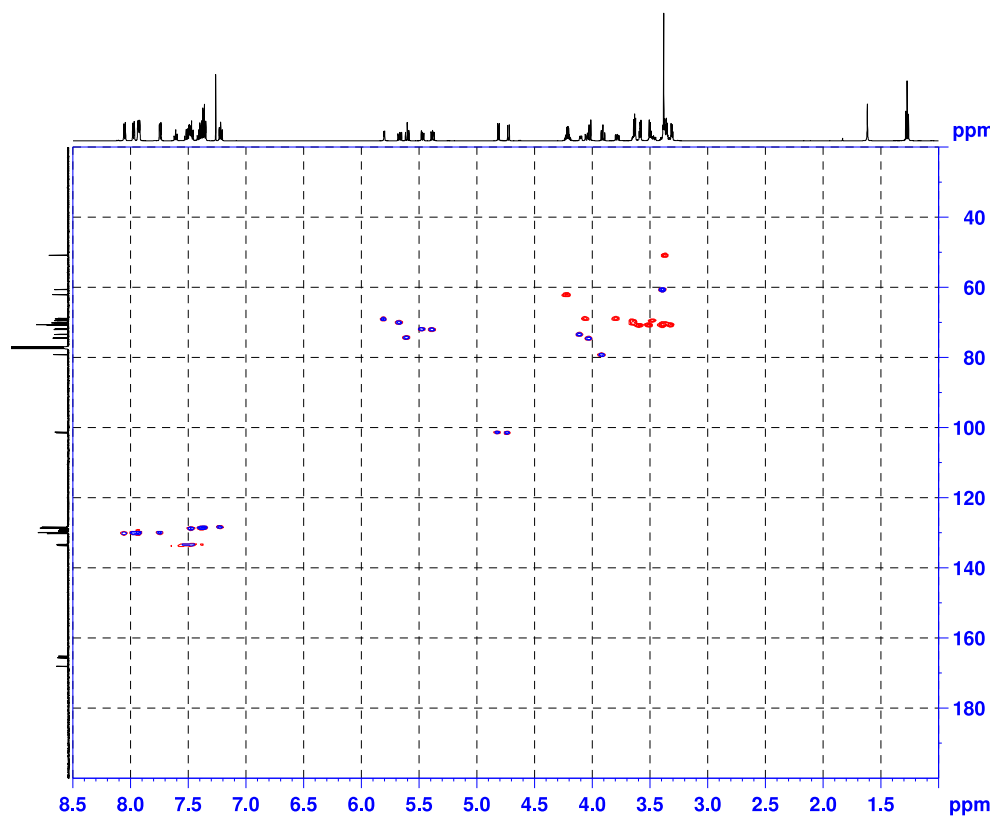

**BRUKER**

```

NAME          sk-1-226 HSQC
EXPNO         1
PROCNO        1
Date_         20190424
Time          12.48
INSTRUM       spect
PROBHD        5 mm TXI 1H/2H
PULPROG       hsgcsetqg
TD            1024
SOLVENT       CDCl3
NS            16
DS            16
SWH           8012.820 H
FIDRES        7.8260204 H
AQ            0.0840100 s
RG            18190.4
DM            62.400 u
DE            6.50 u
TE            298.0 K
CMST2         145.0000000
D0            0.00000000
D1            1.50000000 s
D4            0.00172414 s
D11           0.03000000 s
D13           0.00000000 s
D16           0.00020000 s
D21           0.00345000 s
IND           0.00000000 s
ZGPTNS
----- CHANNEL f1 -----
NUC1          1H
P1            8.00 u
P2            16.00 u
P3            15.00 u
P4            30.00 u
PCPD2        75.00 u
PL1          -1.00 d
PL2          -2.40 d
PL12         1.150 d
PL2W         218.25791931 W
PL2W         8.72910172 W
SFO1         150.9178798 M
SFO2
----- CHANNEL f2 -----
CFPRG2       gqcp
MPC2         13C
P3           15.00 u
P4           30.00 u
PCPD2        75.00 u
PL2          -2.40 d
PL12         1.150 d
PL2W         218.25791931 W
PL2W         8.72910172 W
SFO1         150.9178798 M
SFO2
----- GRADIENT CHANNEL -----
GPNAM1       SINE.100
GPNAM2       SINE.100
GPX1         0.00 u
GPX2         0.00 u
GPY1         0.00 u
GPY2         0.00 u
GPZ1         145.00 u
GPZ2         20.10 u
F16          1000.00 u
NDO          2
TD           256
SFO1         150.9141 M
SFO2         97.648676 H
SW           145.629 H
FAMODE       Echo-Antiecho
SI           1024
SF           600.130041 M
SSB          2
WDW          QBSINE
GB           0
LB           0.00 H
GB           1.40
PC           1.024
SI           1024
MC2          echo-antiecho
SF           150.9027761 M
SSB          2
WDW          QBSINE
GB           0.00 u
    
```

9: HMBC (CDCl<sub>3</sub>)

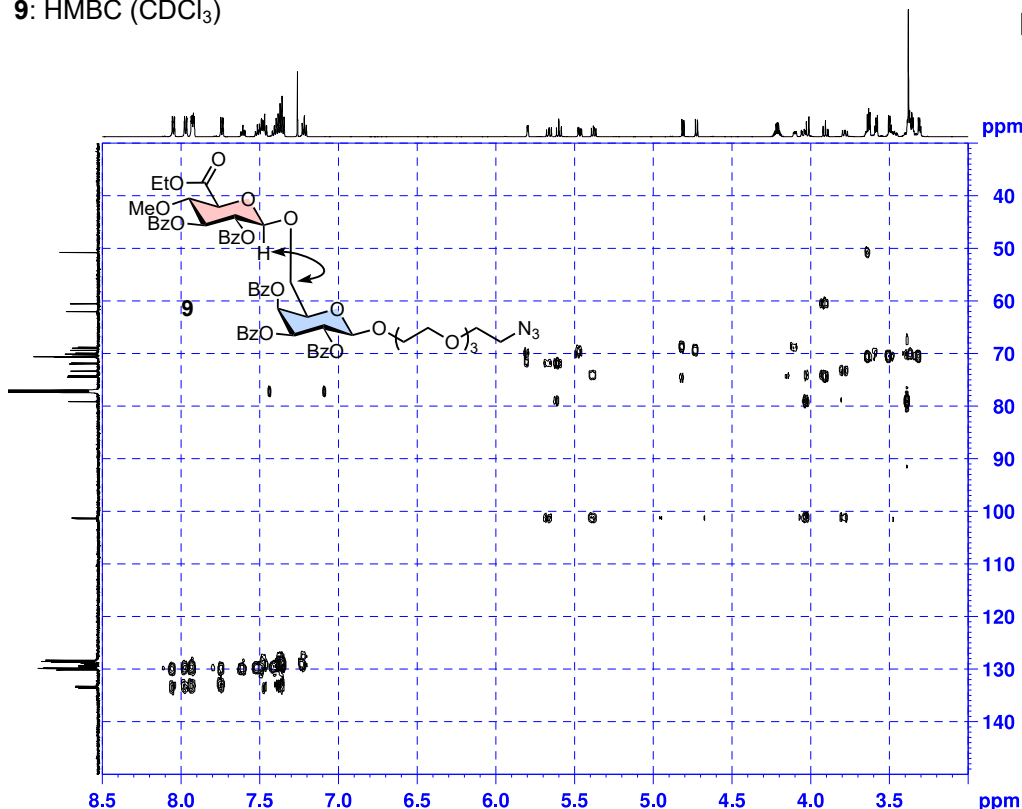

**BRUKER**

```

EXPNO         1
PROCNO        1
Date_         20190424
Time          15.51
INSTRUM       spect
PROBHD        5 mm TXI 1H/2H
PULPROG       hmbcgp1pnoqg
TD            4096
SOLVENT       CDCl3
NS            32
DS            16
SWH           7768.162 H
FIDRES        1.901007 H
AQ            0.2630774 s
RG            18190.4
DM            64.200 u
DE            6.50 u
TE            298.0 K
CMST2         145.0000000
D0            0.00000000
D1            1.50000000 s
D4            0.00172414 s
D11           0.03000000 s
D13           0.00000000 s
D16           0.00020000 s
D21           0.00345000 s
IND           0.00000000 s
ZGPTNS
----- CHANNEL f1 -----
NUC1          1H
P1            8.00 u
P2            16.00 u
P3            15.00 u
P4            30.00 u
PCPD2        75.00 u
PL1          -1.00 d
PL2          -2.40 d
PL12         1.150 d
PL2W         218.25791931 W
PL2W         8.72910172 W
SFO1         150.9178798 M
SFO2
----- CHANNEL f2 -----
NUC2          13C
P3           15.00 u
P4           30.00 u
PCPD2        75.00 u
PL2          -2.40 d
PL12         1.150 d
PL2W         218.25791931 W
PL2W         8.72910172 W
SFO1         150.9178798 M
SFO2
----- GRADIENT CHANNEL -----
GPNAM1       SINE.100
GPNAM2       SINE.100
GPNAM3       SINE.100
GPX1         0.00 u
GPX2         0.00 u
GPX3         0.00 u
GPY1         0.00 u
GPY2         0.00 u
GPY3         0.00 u
GPZ1         145.00 u
GPZ2         30.00 u
GPZ3         40.10 u
F16          1000.00 u
NDO          2
TD           256
SFO1         150.9179 M
SFO2         261.860280 H
SW           222.095 H
FAMODE       QF
SI           2048
SF           600.130075 M
SSB          0
WDW          SINE
GB           0
LB           0.00 H
GB           1.40
PC           1.024
SI           1024
MC2          echo-antiecho
SF           150.9027957 M
SSB          2
WDW          SINE
GB           0.00 u
    
```

10: <sup>1</sup>H NMR (600 MHz, CDCl<sub>3</sub>)

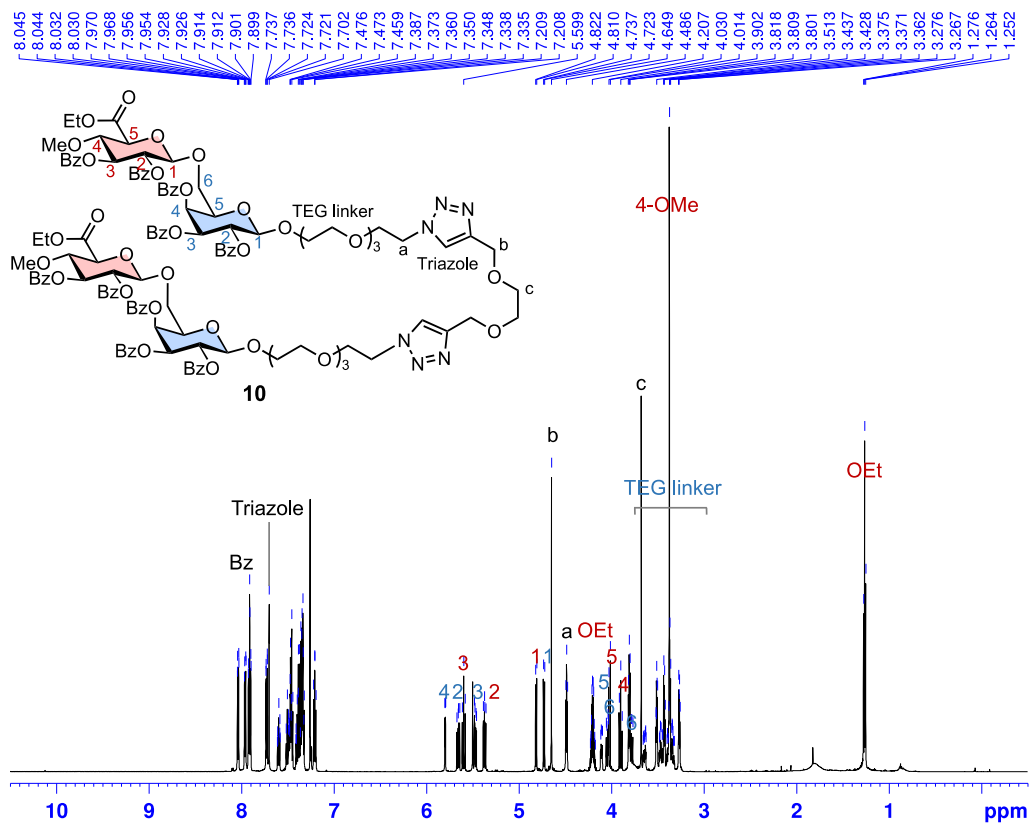

10: <sup>13</sup>C NMR (150 MHz, CDCl<sub>3</sub>)

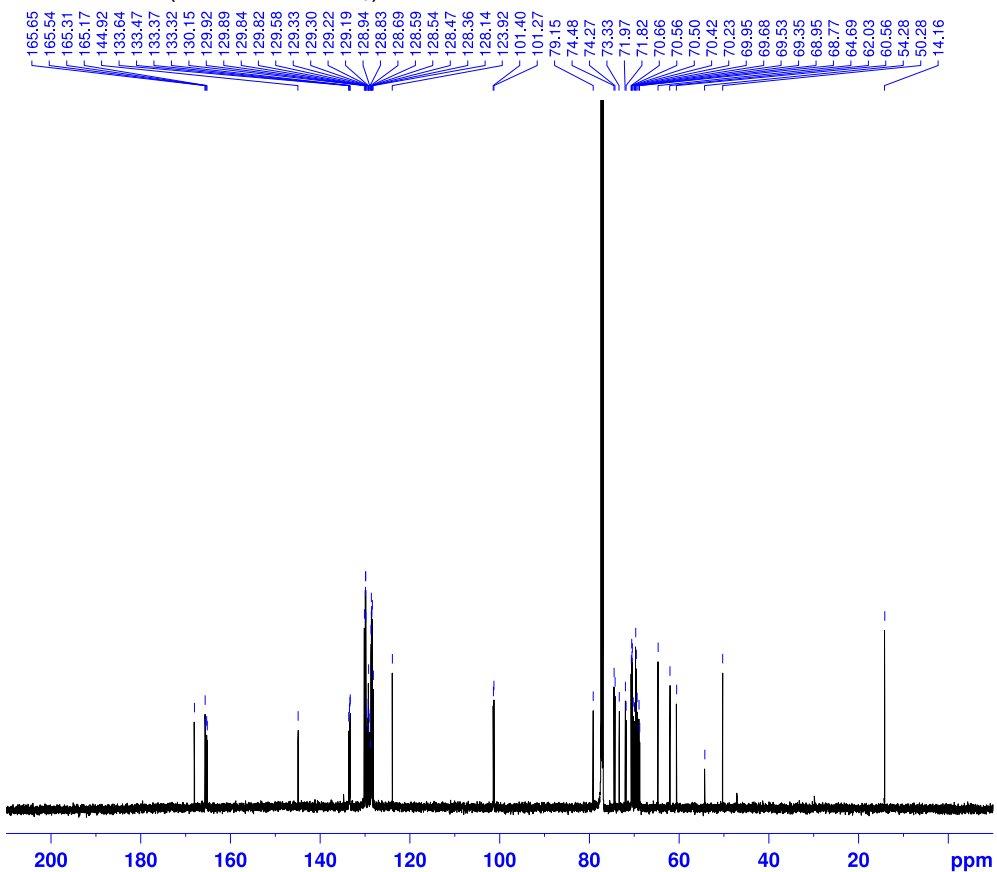

11: <sup>1</sup>H NMR (600 MHz, CDCl<sub>3</sub>)

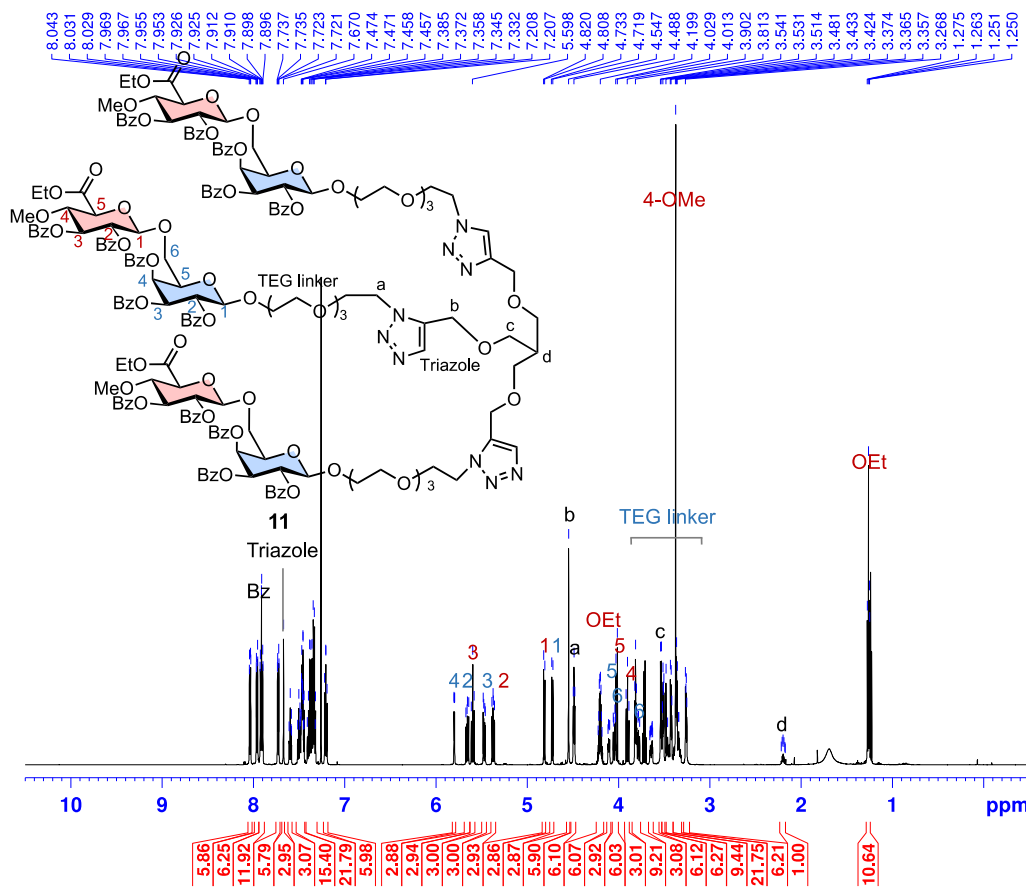

11: <sup>13</sup>C NMR (150 MHz, CDCl<sub>3</sub>)

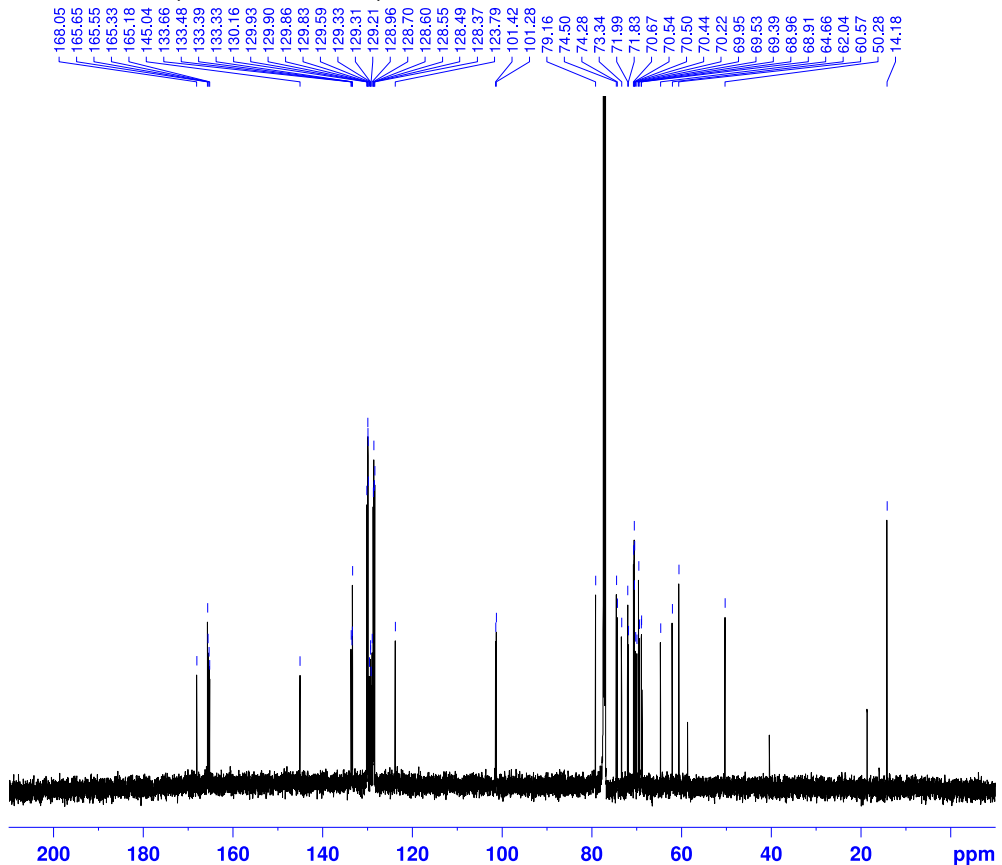



12 <sup>1</sup>H NMR (600 MHz, CDCl<sub>3</sub>)

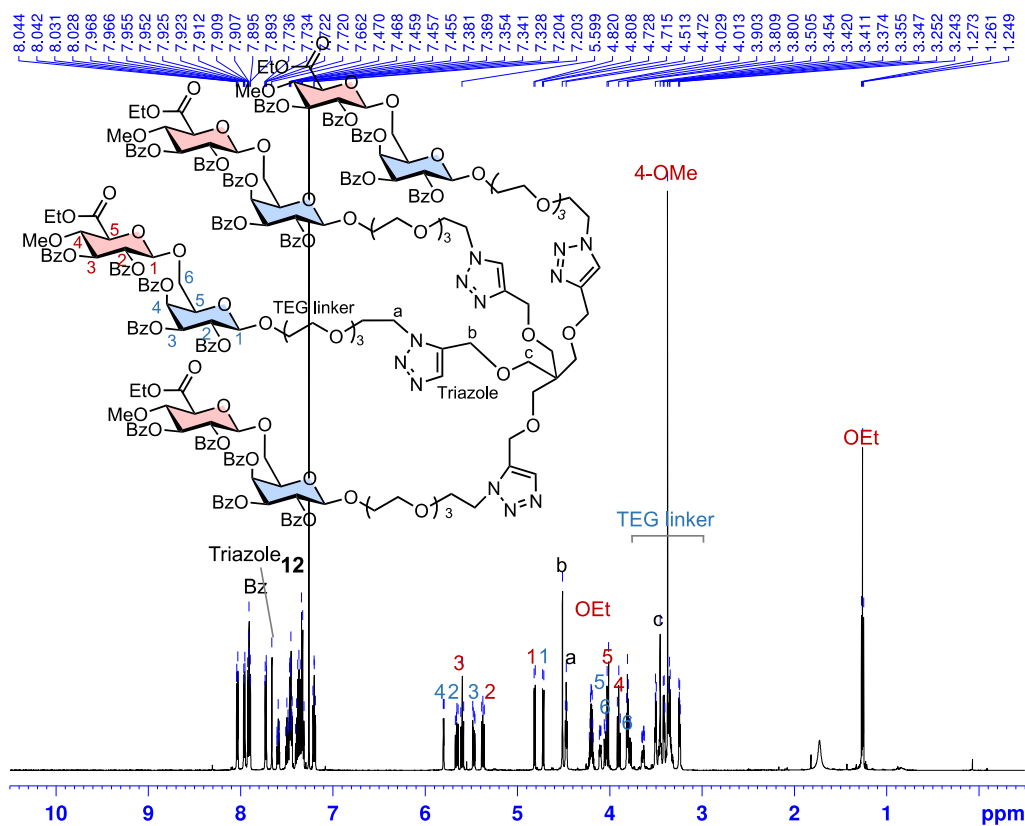

12: <sup>13</sup>C NMR (150 MHz, CDCl<sub>3</sub>)

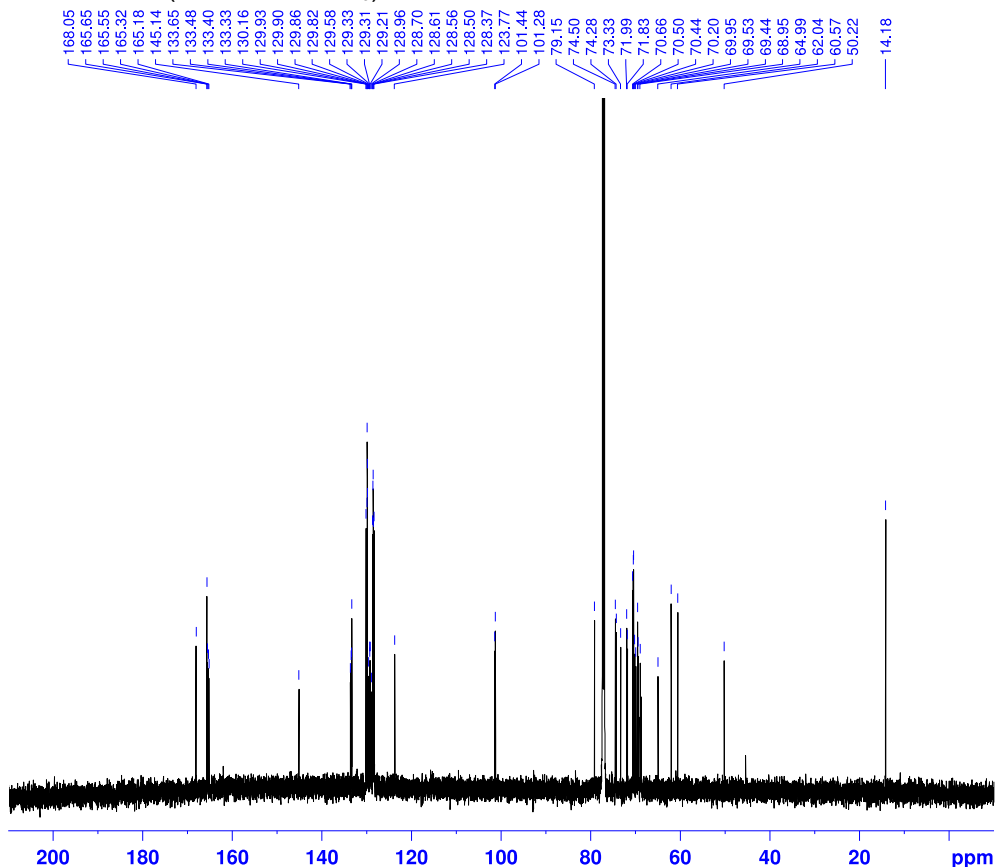

AMOR dimer: <sup>1</sup>H NMR (600 MHz, D<sub>2</sub>O)

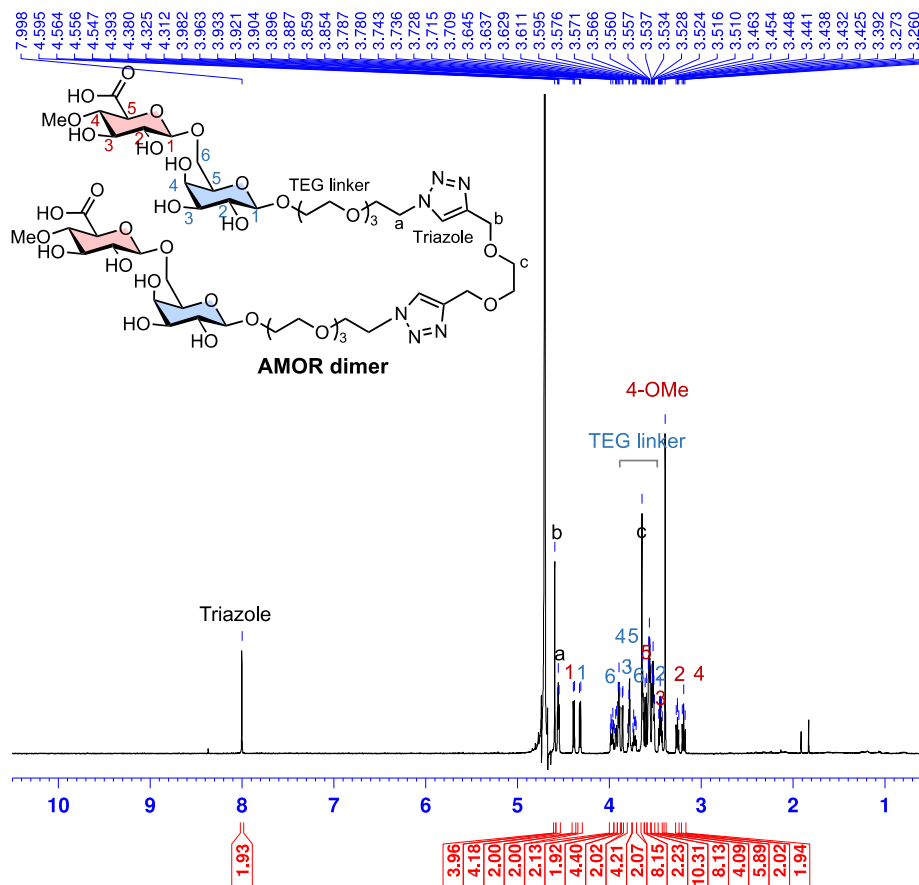

AMOR trimer: <sup>1</sup>H NMR (600 MHz, D<sub>2</sub>O)

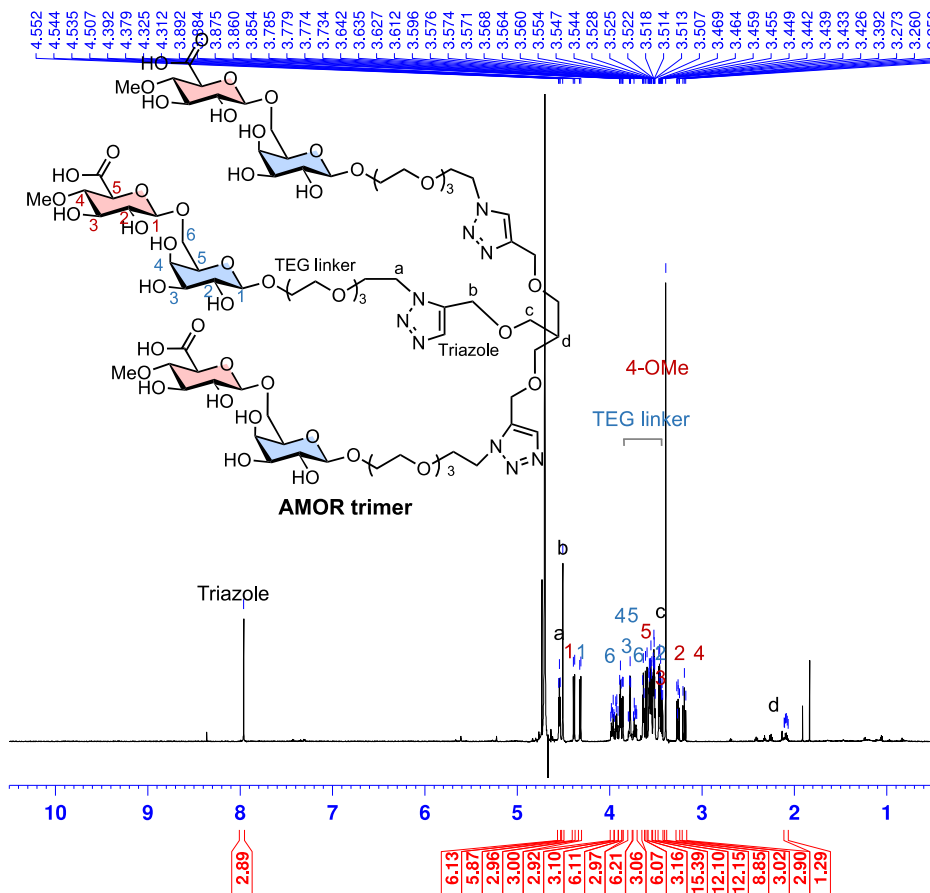

AMOR tetramer: <sup>1</sup>H NMR (600 MHz, D<sub>2</sub>O)

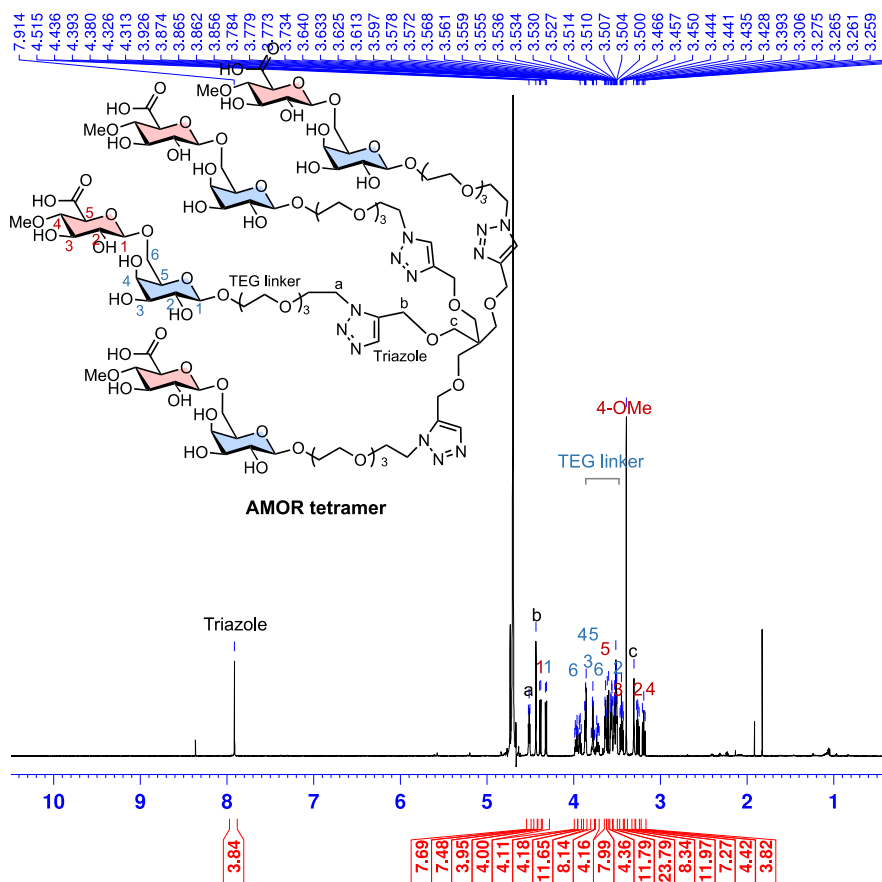

## 4. Material and methods for AMOR bioactivity

### Plant materials and growth conditions

*Torenia fournieri* cv. 'blue and white' (Sakata no Tane, Yokohama, Japan) plants were grown in soil at 28°C with a 16-h photoperiod (~150  $\mu\text{mol}/\text{m}^2\text{s}^1$ ).

### AMOR activity of synthesised AMOR and AMOR oligomers

AMOR activity was measured using a previously reported AMOR assay<sup>4,5</sup>. The centre of an agar plate of modified Nitsch's medium in a glass-bottom dish (D210402; Matsunami Glass, Osaka, Japan) was cut into an ~18 × 22 mm<sup>2</sup> rectangle and the agar block was removed. In this space, growth medium [modified Nitsch's medium containing 13% polyethylene glycol 4000 (w/v) and 1% sucrose (w/v)] containing AMOR (TCI Chemicals) or AMOR oligomers with 1.5% ultra-low-gelling agarose (agarose type IX-A; Sigma) were spread to form a thin layer of agar and the cut end of a 15-mm-long hand-pollinated style was embedded before solidification. This agar plate was incubated in the dark at 28°C for 16 h. After pollen tube incubation, the H<sub>2</sub>O-saturated silicon oil (KF-96-100CS; Shin-Etsu Chemical Co., Ltd., Tokyo, Japan) was layered, and the pollen tubes were subjected to the guidance assay through micromanipulation. Under observation using an inverted microscope (AxioObserver Z1; Zeiss, Oberkochen, Germany), a single ovule was picked up using a glass needle produced using a glass needle puller (MCF-100; Nepa Gene, Chiba, Japan) and placed in front of the pollen tubes using a manipulator (MTK-1SH; Narishige Group, Amityville, NY, USA).

### Aniline blue staining of *in vitro* and semi-*in vitro* pollen-tube growth

To observe the pollen tubes *in vitro*, pollen grains were germinated on growth medium [modified Nitsch's medium containing 13% polyethylene glycol 4000 (w/v), and 1% sucrose (w/v)] containing AMOR (TCI Chemicals) or multivalent AMORs with 1.5% ultra-low-gelling agarose (agarose type IX-A; Sigma) and incubated in the dark at 28°C for 16 h. To observe the pollen tubes semi-*in vitro*, the cut end of a 15-mm-long hand-pollinated style was placed on the growth medium containing AMOR (TCI Chemicals) or multivalent AMORs with 1.5% ultra-low-gelling agarose and incubated at dark at 28°C for 16 h. After incubation, callose plugs in pollen tubes were labelled using 0.1% aniline blue dye (in 0.1 M K<sub>2</sub>HPO<sub>4</sub>) and observed using an AxioObserver Z1 inverted microscope (Zeiss)<sup>6</sup>.

## 5. References

- 1 B. Mishra, S. Manmode, G. Walke, S. Chakraborty, M. Neralkar and S. Hotha, *Org. Biomol. Chem.*, 2021, **19**, 1315–1328.
- 2 E. M. Ericsson, K. Enander, L. Bui, I. Lundström, P. Konradsson and B. Liedberg, *Langmuir*, 2013, **29**, 11687–11694.
- 3 M. Chwalek, R. Auzély and S. Fort, *Org. Biomol. Chem.*, 2009, **7**, 1680–1688.
- 4 A. G. Mizukami, R. Inatsugi, J. Jiao, T. Kotake, K. Kuwata, K. Ootani, S. Okuda, S. Sankaranarayanan, Y. Sato, D. Maruyama, H. Iwai, E. Garénaux, C. Sato, K. Kitajima, Y. Tsumuraya, H. Mori, J. Yamaguchi, K. Itami, N. Sasaki and T. Higashiyama, *Curr. Biol.*, 2016, **26**, 1091–1097.
- 5 J. Jiao, A. G. Mizukami, S. Sankaranarayanan, J. Yamguchi, K. Itami and T. Higashiyawma, *Plant Physiol.*, 2017, **173**, 354–363.
- 6 K. Matsuura-Tokita, T. Suzuki, Y. Kimata, Y. Takebayashi, M. Ueda, T. Nakano, H. Sakakibara, A. Nakano and T. Higashiyama, *bioRxiv*, , DOI:10.1101/2024.05.07.592278.
